1                   **Medicago SPX1 and SPX3 regulate phosphate homeostasis,**  
2                   **mycorrhizal colonization and arbuscule degradation**

3 Peng Wang, Roxane Snijders, Wouter Kohlen, Jieyu Liu, Ton Bisseling, Erik Limpens\*

4 Laboratory of Molecular Biology, Wageningen University & Research, 6708 PB Wageningen,  
5 the Netherlands

6 \*To whom correspondence should be addressed. Email: [erik.limpens@wur.nl](mailto:erik.limpens@wur.nl) <sup>1</sup>

7

8 **Key words:** SPX, phosphate homeostasis, arbuscular mycorrhiza, arbuscule development,  
9 strigolactone

10

11

12

13

14

15

16

17

18

19

20

21

---

<sup>1</sup> The author responsible for distribution of materials integral to the findings presented in this article in accordance with the policy described in the Instructions for Authors ([www.plantcell.org](http://www.plantcell.org)) is: Erik Limpens ([erik.limpens@wur.nl](mailto:erik.limpens@wur.nl)).

22 **Abstract**

23 To acquire sufficient mineral nutrients such as phosphate (Pi) from the soil, most plants  
24 engage in a symbiosis with arbuscular mycorrhizal (AM) fungi. Attracted by plant-secreted  
25 strigolactones, the fungi colonize the roots and form highly-branched hyphal structures called  
26 arbuscules inside inner cortex cells. It is essential that the host plant controls the different  
27 steps of this interaction to maintain its symbiotic nature. However, how plants sense the  
28 amount of Pi obtained from the fungus and how this determines the arbuscule lifetime is far  
29 from understood. Here, we show that *Medicago truncatula* SPX-domain containing proteins  
30 SPX1 and SPX3 regulate root phosphate starvation responses as well as fungal colonization  
31 and arbuscule degradation. *SPX1* and *SPX3* are induced upon phosphate starvation but  
32 become restricted to arbuscule-containing cells upon establishment of the symbiosis. Under  
33 Pi-limiting conditions they facilitate the expression of the strigolactone biosynthesis gene  
34 *DWARF27*, which correlates with increased fungal branching by root exudates and increased  
35 root colonization. Later, in the arbuscule-containing cells SPX1 and SPX3 redundantly  
36 control the timely degradation of arbuscules. This regulation does not seem to involve direct  
37 interactions with known transcriptional regulators of arbuscule degradation. We propose a  
38 model where SPX1 and SPX3 control arbuscule degeneration in a Pi-dependent manner via a  
39 yet-to-identify negative regulator.

40

41

## 42 **Introduction**

43 In nature, plants usually face low mineral phosphate (Pi) availability in the soil, which limits  
44 their growth and development (Rouached et al., 2010). To deal with such phosphate limitation,  
45 plants typically induce a set of phosphate starvation induced (PSI) genes to acquire more Pi  
46 from the soil and to increase phosphate use efficiency (Bari et al., 2006; Zhou et al., 2008). In  
47 addition, most land plants engage in a symbiosis with arbuscular mycorrhizal (AM) fungi to  
48 increase their phosphate acquisition efficiency (Smith and Read, 2008). Under Pi starvation  
49 conditions, plant roots release strigolactones (SLs) that enhance spore germination and hyphal  
50 branching to initiate a symbiotic association (Akiyama et al., 2005; Besserer et al., 2006).  
51 Subsequently the fungus colonizes the roots and forms highly branched hyphal structures,  
52 called arbuscules, inside root cortex cells and its hyphae continue to form extensive networks  
53 in the soil. The hyphae can efficiently reach the scarcely available phosphate, which they  
54 deliver to the plant in return for carbon (fatty acids and sugars) (Luginbuehl and Oldroyd,  
55 2017).

56 The maintenance of proper Pi homeostasis is important for plant growth and development, as  
57 either too low or too high Pi concentration in plant cells can be harmful to the plant (Wang et  
58 al., 2014). Therefore plants continuously sense and signal the phosphate status in response to  
59 their environment. Also during the symbiosis the plant must integrate phosphate status with  
60 fungal colonization and arbuscule development to keep the interaction beneficial. However,  
61 how a plant determines how much Pi it gets locally at the arbuscules and regulates Pi  
62 homeostasis in relation to arbuscule development is still an open question (Ezawa and Saito,  
63 2018; Müller and Harrison, 2019).

64 Arbuscules form a symbiotic interface where Pi is provided to the host plant (Ezawa and Saito,  
65 2018). They are relatively short lived structures that are degraded and removed from the  
66 cortical cells after 2-7 days (Kobae and Hata, 2010). This transient characteristic is thought to  
67 give the plant a means to locally abort arbuscules when these due to their age do not deliver  
68 sufficient nutrients (Lanfranco et al., 2018). In line with this, loss of the arbuscule-containing  
69 cell-specific PHOSPHATE TRANSPORTER 4 (PT4), responsible for transporting Pi across  
70 the peri-arbuscular membrane into the plant cell, leads to the premature degradation of the  
71 arbuscules in the model legume *Medicago truncatula* (Medicago) (Javot et al., 2007). This  
72 requires the activity of the MYB1 transcription factor, which induces the expression of  
73 hydrolytic enzymes such as cysteine proteases and chitinases to degrade the arbuscules (Floss

74 et al., 2017). Intriguingly, it has been shown that *Medicago* can also adjust the amount of  
75 carbon that it delivers to the fungus depending on the amount of Pi obtained from the fungus  
76 (Kiers et al., 2011). AM fungal strains that deliver more Pi were shown to receive more  
77 carbon compared to less cooperative strains. This so-called reciprocal rewarding indicates that  
78 the plant is able to locally monitor the amount of Pi that it obtains from the fungus.

79 SPX domain containing proteins have emerged as key sensors and regulators of Pi  
80 homeostasis and signaling (Jung et al., 2018). The SPX domain is named after the Suppressor  
81 of Yeast *gpa1* (*Syg1*), the yeast Phosphatase 81 (*Pho81*), and the human Xenotropic and  
82 Polytropic Retrovirus receptor 1 (*Xpr1*). This domain is able to sense the Pi status of a cell by  
83 binding with high affinity to inositol polyphosphates (PP-InsPs; (Wild et al., 2016; Jung et al.,  
84 2018). Changes in PP-InsPs levels in response to Pi deficiency are thought to modulate the  
85 activity of SPX-containing proteins and their interactors. The mode of action of single SPX  
86 domain containing proteins in the phosphate starvation response has been best studied in rice  
87 and *Arabidopsis*. The nuclear localized SPX1 and SPX2 proteins in *Arabidopsis* were shown  
88 to interact with PHOSPHATE STARVATION RESPONSE 1 (*AtPHR1*), a MYB  
89 transcription factor that together with its homologs controls phosphate starvation induced  
90 gene expression (Puga et al., 2014; Sun et al., 2016). Binding of *AtSPX1/2* to *AtPHR1* occurs  
91 at high Pi conditions and prevents the binding of *AtPHR1* to the PHR1 binding site (P1BS)  
92 cis-regulatory element present in the promoters of many PSI genes. Similar regulation has  
93 been reported in rice where *OsSPX1* and *OsSPX2* control the activity of *OsPHR2* in a  
94 phosphate dependent manner (Wang et al., 2014). Other SPX members, such as *OsSPX4* have  
95 been localized in the cytoplasm where they control the cytoplasm-to-nucleus shuttling of  
96 *OsPHR2* in a Pi dependent manner (Hu et al., 2019). Furthermore, *OsSPX4* was reported to  
97 regulate nitrate and phosphate balance in rice through interaction with the nitrate transceptor  
98 *OsNRT1.1B*, which triggers *OsSPX4* degradation upon nitrate perception (Hu et al., 2019).  
99 *OsSPX3* and *OsSPX5* have been localized in both the cytoplasm and nucleus, and  
100 redundantly modulate Pi homeostasis as functional repressors of *OsPHR2* (Shi et al., 2014).

101 Given their key role in sensing and signaling of phosphate status in cells, we studied the role  
102 of SPX proteins during AM symbiosis. We identified two *SPX* genes that are strongly  
103 upregulated upon AM symbiosis, most specifically in the arbuscule-containing cells of  
104 *Medicago*. We show that these genes regulate Pi homeostasis in non-mycorrhizal conditions,  
105 and during the symbiosis positively control mycorrhizal colonization, in part through the  
106 regulation of strigolactone levels, as well as the timely degradation of arbuscules.

107

108

## 109 **Results**

### 110 ***SPX1* and *SPX3* are strongly induced upon phosphate starvation and in arbuscule-** 111 **containing cells**

112 To identify *SPX* genes that might be important players during AM symbiosis, we first made a  
113 phylogenetic analysis of all single *SPX* domain proteins from Medicago, in relation to *SPX*  
114 proteins from arabidopsis and rice. This identified 6 members (Fig. 1A). We analyzed their  
115 expression in the roots of plants grown in high (500  $\mu$ M) Pi, low (20  $\mu$ M) Pi and 20  $\mu$ M Pi  
116 plus *Rhizophagus irregularis* conditions for 3 weeks. qRT-PCR analyses showed that two  
117 *SPX* genes, *MtSPX1* (Medtr3g107393; hereafter *SPX1*) and *MtSPX3* (Medtr0262s0060;  
118 hereafter *SPX3*) were strongly induced by phosphate starvation as well as during the AM  
119 symbiosis (Fig. 1B). Transcriptome analyses of laser microdissected arbuscule-containing  
120 cells showed that these two *SPX* genes are dominantly expressed in arbuscule-containing cells  
121 (Fig. S1). To determine the spatial expression of *SPX1* and *SPX3* in more detail we analyzed  
122 promoter-GUS reporter constructs in transgenic roots grown for 3 weeks at 500  $\mu$ M Pi, 20  
123  $\mu$ M Pi and 20  $\mu$ M Pi with *R. irregularis* conditions. Plants grown at 500  $\mu$ M Pi showed only  
124 weak GUS signal in the root tip, while under low Pi conditions strong GUS activity was  
125 detected throughout the root for both constructs (Fig. 1C-F). Sectioning of these roots showed  
126 that the *SPX1* and *SPX3* promoters were active in multiple cell types, including cortex and  
127 epidermis, of the root grown at low Pi, but not at high Pi (Fig. 1G, H). Upon AM symbiosis,  
128 the GUS signal became strongly restricted to the arbuscule-containing cells (Fig. 1I-L). No, or  
129 very low, GUS signal was observed in the non-colonized sections of the mycorrhizal roots.  
130 The arbuscule restricted expression was further confirmed by promoter:NLS-3 $\times$ GFP analyses  
131 (Fig. S2). The same expression pattern of both *SPX* genes suggested that they may have  
132 similar functions, playing dual roles in the phosphate starvation response and AM symbiosis.

133 To study the subcellular localization of *SPX1* and *SPX3*, C-terminal GFP-fusion constructs  
134 were expressed in Medicago roots and Nicotiana leaves using either the constitutive *Lotus*  
135 *japonicus Ubiquitin1* (*LjUB1*) promoter or their endogenous promoters. In all cases, including  
136 arbuscule-containing cells expressing *SPX*-GFP fusion under the control of their endogenous  
137 promoters, both fusion proteins localized to the cytoplasm as well as to the nucleus (Fig. S3A-  
138 E). The subcellular localization was not influenced by the Pi conditions (Fig. S3C, D).

139 To explain the transcriptional regulation of *SPX1* and *SPX3*, we examined their presumed  
140 promoter regions for known *cis*-regulatory elements involved in phosphate-starvation induced

141 expression and arbuscule-specific regulation. This identified a P1BS (GNATATNC) binding  
142 site for the MYB transcription factor PHR (Bustos et al., 2010), a key regulator of PSI genes  
143 (Fig. S4). The presence of this element suggests that both SPX genes are under the control of  
144 PHR-dependent transcriptional regulation upon phosphate stress. Furthermore, we identified  
145 *cis*-regulatory AW-boxes (CG(N)<sub>7</sub>CNANG) and CTTC-elements (CTTCTTGTTTC) in the  
146 promoter regions of both genes, which are binding sites for WRINKLED1-like transcription  
147 factors that have recently been found to regulate arbuscule-specific expression (Fig. S4).  
148 These elements can be found in the promoters of many arbuscule-enhanced genes,  
149 including genes involved in fatty acid synthesis and transport as well as genes required for  
150 phosphate uptake from the arbuscules (Xue et al., 2018; Jiang et al., 2018; Pimprikar et al.,  
151 2018). The presence of both P1BS and AW-box *cis*-regulatory elements may explain the  
152 observed expression patterns in the different conditions, although this remains to be  
153 experimentally verified.

#### 154 **SPX1 and SPX3 regulate phosphate homeostasis**

155 To study the function of SPX1 and SPX3, we identified *spx1* (NF13203\_high\_1) and *spx3*  
156 (NF4752\_high\_18) Tnt1-retrotransposon insertion mutants (Fig. S5A). Genotyping by PCR  
157 confirmed the Tnt1 insertion and a *spx1spx3* double mutant was developed by crossing *spx1*  
158 to *spx3* (Fig. S5B). RT-PCR confirmed the impairment of *SPX1* and/or *SPX3* expression in  
159 the respective mutant lines (Fig. S5C).

160 Since SPX proteins are thought to negatively regulate PHR activity at high Pi conditions to  
161 prevent the overaccumulation of phosphate, we first analysed the expression of PSI genes in  
162 the mutants and R108 wild-type under high and low Pi conditions. This showed a  
163 significantly higher expression of the PSI genes *Mt4* (U76742.1) (Burleigh and Harrison,  
164 1999) and the phosphate transporter encoding gene *PT6* (Medtr1g069935) (Mbodj et al., 2018;  
165 Hu et al., 2019) in the *spx1spx3* double mutant under high Pi conditions (Fig. 2B). It  
166 correlated with a decreased shoot:root fresh weight ratio indicative of a phosphate starvation  
167 response in the double mutant (Fig. 2A, E). Furthermore, phosphate levels were increased in  
168 the shoots of the double mutant compared to wild-type plants grown at 500  $\mu$ M Pi (Fig. 2F).  
169 Prolonged growth at 500  $\mu$ M Pi further showed typical Pi toxicity effects (yellow colouring of  
170 the leaf margins) in the leaves of the double mutant (Fig. S6A). The single mutant lines did  
171 not show obvious phenotypes when grown at 500  $\mu$ M Pi condition (Fig. 2A, E, F). These

172 results suggest a negative role of SPX1 and SPX3 on phosphate starvation responses when  
173 ample Pi is available.

174 At low (20  $\mu$ M) Pi conditions the fresh weight of the *spx1* and *spx3* single mutants was  
175 significantly lower than wild-type R108 plants, and the *spx1spx3* double mutant showed an  
176 additive effect (Fig. 2C-F, S6B). The *spx1spx3* double mutant also showed a slight but  
177 significant higher shoot/root fresh weight ratio (Fig. 2E). The leaves of the double mutant  
178 further showed accumulation of anthocyanins in the leaves indicative of Pi starvation stress  
179 (Fig. S6B). Consistently, the PSI genes *Mt4* and *PT6* were lower expressed in the double  
180 mutant compared to the wild type (Fig. 2D), while overexpression of *SPX1/3* enhanced the  
181 expression of *Mt4* and *PT6* at low Pi conditions (Fig. 3E). Shoot Pi concentration in single  
182 mutants and double mutant were all significantly lower compared to the wild type (Fig. 2F).  
183 These results suggest that SPX1 and SPX3 also play a positive role in the PSR response under  
184 limiting (20  $\mu$ M) Pi conditions.

185 Overall, these results indicate that SPX1 and SPX3 are able to enhance the Pi starvation  
186 response at low Pi conditions and inhibit the Pi starvation response at high Pi conditions.

### 187 **SPX1 and SPX3 interact with PHR2**

188 In Arabidopsis and rice, SPX proteins have been reported to interact with PHR and inhibit its  
189 activity under high Pi conditions (Wang et al., 2014; Puga et al., 2014). Therefore, we  
190 checked whether SPX1 and SPX3 could also interact with Medicago PHR homologs.  
191 Phylogenetic analyses indicated the presence of three PHR-like proteins in Medicago (Fig.  
192 S7). Co-immunoprecipitation analyses of GFP-tagged PHR with FLAG-tagged SPX1/3  
193 proteins expressed in Nicotiana leaves revealed a clear interaction of both SPX1 and SPX3  
194 with MtPHR2 (Medtr1g080330; hereafter PHR2 Fig. 3A). No significant interaction was  
195 found for the other two Medicago PHR-like proteins.

196 To study whether PHR2 is indeed involved in the phosphate starvation response, we  
197 overexpressed *PHR2* using the *LjUB1* promoter in Medicago roots and analyzed the effect on  
198 the expression of PSI genes *Mt4* *PT6* (Mbodj et al., 2018; Hu et al., 2019). Both *Mt4* and *PT6*  
199 are strongly induced under Pi limiting conditions and also show induced expression upon  
200 overexpression of *PHR2* (Fig. 3B, C). *PHR2* itself was not regulated in a Pi-dependent  
201 manner at the transcriptional level (Fig. 3B), in analogy to its homologs *AtPHR1* (Bustos et al.,  
202 2010) and *OsPHR2* (Zhou et al., 2008).



203 To determine whether the observed Pi related phenotypes are due to a negative regulation of  
204 PHR2 activity by SPX1 and SPX3 we overexpressed of *SPX1&3* together with *PHR2* using  
205 the *LjUBI* promoter in Medicago roots. This showed that overexpression of *SPX1* or *SPX3*  
206 could indeed inhibit the induction of *Mt4* and *PT6* by PHR2 under high Pi conditions (Fig.  
207 3D). We noticed that the (over)expression level of *PHR2* was ~ 2x lower for the co-  
208 expression constructs containing *SPX1* and *SPX3* compared to overexpression of PHR2 alone.  
209 This is likely a result of the expression construct rather than an effect of SPX1/3 on the  
210 activity of the *LjUBI* promoter. The much stronger (> 40x) reduced *Mt4* levels upon co-  
211 expression of *SPX1/3* support the inhibitory effect of SPX1/3 on the activity of PHR2 when  
212 sufficient Pi levels are reached.

### 213 **SPX1 and SPX3 regulate AM colonization and arbuscule degeneration**

214 Next, we examined the role of SPX1 and SPX3 in the interaction with AM fungi. Three  
215 weeks after inoculation with *R. irregularis* spores, mycorrhization was quantified in the *spx1*  
216 and *spx3* single mutants, the *spx1spx3* double mutant and R108 wild-type controls using the  
217 magnified intersect method (McGONIGLE et al., 1990). Eight plants were used as replicates  
218 for each line. Compared to R108, single mutant and double mutant plants all showed  
219 significantly lower root colonization levels and arbuscule abundance (Fig. 4A). Transcript  
220 levels of *RiEF* and *PT4*, molecular markers for respectively fungal colonization and arbuscule  
221 abundance, confirmed the lower colonization levels in the mutants (Fig. 4B).

222 Because *SPX1* and *SPX3* are specifically expressed in arbuscule-containing cells in  
223 mycorrhized roots, arbuscule morphology was quantified in more detail. We defined  
224 arbuscules larger or equal to 40 µm as “good” arbuscules, and arbuscules smaller than 40 µm  
225 with typical features of degradation, including visible septa, as “degrading” arbuscules (Fig.  
226 4C). Interestingly, there were significantly less degrading arbuscules in the *spx1spx3* double  
227 mutant compared to R108 wild-type plants, resulting in a much higher good/degrading  
228 arbuscule ratio (Fig. 4A, E, F). *spx1* and *spx3* single mutant showed a similar good/degrading  
229 arbuscule ratio as wild-type R108 (Fig. 4A), suggesting a redundant role for SPX1 and SPX3  
230 in the regulation of arbuscule degradation.

231 Arbuscule degradation in Medicago is regulated by the MYB1 transcription factor, which  
232 controls the expression of hydrolase genes such as *Cysteine Protease 3 (CP3)* and *Chitinase*  
233 (Floss et al., 2017). qRT-PCR analyses showed a strongly impaired expression of these  
234 hydrolase genes in the *spx1spx3* double mutant (Fig. 4B). Similar phenotypes were observed

235 upon knock-down of both *SPX1* and *SPX3* by RNA interference (Fig. S8A, B). To further  
236 confirm that the phenotype was indeed caused by a mutation in *SPX1* and *SPX3*, we  
237 complemented the *spx1spx3* double mutant by driving *SPX1* and *SPX3* expression from by  
238 their native promoters in *A. rhizogenes* transformed roots. This indeed complemented the  
239 mycorrhization levels, arbuscule abundance and marker gene expression to wild-type levels  
240 (Fig. S8C, D), showing that the phenotypes are not caused by background insertions/mutation  
241 in the mutant lines.

242 Overall, these results indicate that both *SPX1* and *SPX3* positively regulate AM colonization  
243 levels and redundantly regulate arbuscule degradation.

#### 244 ***SPX1* and *SPX3* likely control AM colonization by regulating strigolactone levels**

245 To explain the positive role of *SPX1* and *SPX3* in mycorrhizal colonization, we found that the  
246 expression of a key gene required for strigolactone biosynthesis, *MtDWARF27* (*D27*; (Hao et  
247 al., 2009; Liu et al., 2011) was not (or much lower) induced upon Pi starvation in *spx1* and  
248 *spx3* single mutants compared to wild-type plants (Fig. 5A). No additive effect on *D27*  
249 expression was observed in the *spx1spx3* double mutant. Under low phosphate conditions,  
250 strigolactone levels increase drastically in several species and this induction in strigolactone  
251 biosynthesis correlates with an increased *D27* expression under this condition (Liu et al., 2011)  
252 (Fig. 5A). *D27* expression was induced when *SPX1* and *SPX3* were overexpressed together at  
253 low Pi conditions using the *LjUBI* promoter in *A. rhizogenes* transformed roots (Fig. S9A).  
254 At high Pi conditions *D27* expression did not appear to be affected (Fig. S9B). This revealed a  
255 positive effect of *SPX1* and *SPX3* on *D27* expression at low Pi conditions, and thereby  
256 possibly on strigolactone levels. Reduced strigolactone levels could explain the lower  
257 colonization levels observed in the mutants as these are key signal molecules that induce  
258 growth and branching in AM fungi (Besserer et al., 2006; Tsuzuki et al., 2016). Unfortunately,  
259 we were unable to detect known strigolactone levels in the R108 genetic background. This  
260 may be caused by sub-detection levels or as yet unknown strigolactone derivatives in R108. As  
261 an alternative, we used an AM hyphal branching assay as proxy for strigolactone levels in  
262 root exudates (Besserer et al., 2006, 2008). This demonstrated that exudates collected from  
263 the *spx1/3* mutant roots, grown under Pi limiting conditions, were much less able to induce *R.*  
264 *irregularis* branching compared to wild-type R108 root exudates (Fig. 5B, S8C). Together  
265 these data strongly suggests that strigolactone levels are reduced in the *spx* mutants, although  
266 an additional effect on other root exudates cannot be ruled out.

267 **Overexpression of SPX1 and SPX3 increases AM colonization and arbuscule**  
268 **degradation**

269 The mutant analyses showed that SPX1 and SPX3 redundantly regulate arbuscule degradation.  
270 To further study this we overexpressed *SPX1*, *SPX3*, and *MtSPX1;MtSPX3* together under the  
271 control of the *LjUBI* promoter. This resulted in significantly increased colonization levels in  
272 individual *LjUBp:SPX1* and *LjUBp:SPX3* transgenic roots as well as double transgenic lines  
273 compared to empty vector control roots 3 weeks post inoculation (Fig. 6A). Furthermore, the  
274 ratio of good/degrading arbuscule was significantly lower in the *SPX1/3* overexpression roots  
275 indicating a premature degradation of arbuscules (Fig. 6A-C). qRT-PCR analyses confirmed  
276 the observed phenotypes (Fig. S10A). *RiEF* was higher expressed in *SPX1* and *SPX3*  
277 overexpression roots compared to empty vector (EV) controls expressed roots. The expression  
278 level of *PT4* as marker for healthy arbuscules was similar between EV control roots and the  
279 *SPX* overexpressing roots. However, arbuscule degradation related genes *CP3* and *Chitinase*  
280 were significantly enhanced in the *SPX* overexpressing roots. We observed a differential  
281 effect of *SPX1* and *SPX3* overexpression on *MYB1* expression, with only *SPX3*  
282 overexpression causing increased *MYB1* expression (Fig. S10A).

283 To separate the arbuscule-specific effects of SPX1/3 from non-symbiotic roles, we  
284 overexpressed *SPX1*, *SPX3*, or both, using the arbuscule-specific *PT4* promoter. Interestingly,  
285 compared to EV transformed roots decreased colonization levels were observed in all *SPX*  
286 overexpressing roots when expressed from the *PT4* promoter (Fig. 6D). This coincided with  
287 decreased arbuscule abundance and an increased ratio of degrading arbuscule compared to  
288 good arbuscule classes (Fig. 6D-F). Transcript levels of the markers for fungal biomass  
289 (*RiEF*), healthy arbuscule abundance (*PT4*) and arbuscule degradation (*MYB1*, *CP3* and  
290 *Chitinase*) all confirmed the visual phenotyping results (Fig. S10B). Because the colonization  
291 levels in *SPX* overexpressing roots were much lower than EV control roots and because *SPX1*  
292 and *SPX3* are normally highly induced in arbuscule-containing cells the overall *SPX1/3*  
293 expression levels did not exceed those in the EV controls (Fig. 1B, 6D, S10B). Overall, these  
294 results further strengthen the role for SPX1/3 in regulating AM colonization and arbuscule  
295 degradation.

296 **SPX1 and SPX3 in relation to known transcriptional regulators of arbuscule**  
297 **degradation**

298 The MYB1 transcription factor was reported to be required for arbuscule degradation when  
299 the fungus does not provide sufficient nutrients. Knock-down of *MYB1* could rescue the  
300 premature arbuscule degradation phenotype observed in *pt4* mutants that lack a functional  
301 symbiotic PT4 phosphate transporter (Floss et al., 2017). To study whether SPX1/3 can also  
302 rescue the *pt4* phenotype, we knocked down both *SPX1* and *SPX3* using RNAi in the *pt4-1*  
303 mutant background (Javot et al., 2007). This resulted in strongly reduced mycorrhization  
304 levels in *Efp:SPX1-SPX3-rcna* transformed *pt4-1* mutant roots compared to EV controls 3  
305 week after inoculation (Fig. S11A). However, the ratio of “Good” to “degrading” arbuscules  
306 was not significantly different between SPX1/3 RNAi-*pt4* and EV-*pt4* samples (Fig. S11A, B).  
307 qPCR analyses further confirmed the observed phenotypes (Fig. S11C). This suggests that  
308 *SPX1/3* function is not essential for arbuscule degradation in this setting.

309 It was further shown that overexpression of *MYB1* can trigger the premature degradation of  
310 arbuscules (Floss et al., 2017). To position the action of SPX1/3 on arbuscule development in  
311 relation to MYB1, we overexpressed *MYB1* under the control of the constitutive CaMV35S  
312 promoter in the *spx1spx3* double mutant and checked whether *CP3* and *Chitinase* could still  
313 be activated. Compared to EV transformed roots, *CP3* and *Chitinase* expression were  
314 significantly induced by *MYB1* in the *spx1spx3* double mutant 3 weeks post inoculation and  
315 lower colonization levels, with less *RiEF* and *PT4* expression, and signs of premature  
316 arbuscule degradation were detected (Fig. S11D, S12). This indicates that SPX1/3 functions  
317 either upstream or parallel of MYB1 to control arbuscule turnover. To distinguish between  
318 these possibilities, we overexpressed both *SPX1* and *SPX3* together and studied the effect on  
319 *MYB1* expression and its target genes under non-symbiotic conditions. At both high and low  
320 Pi conditions, overexpression of *SPX1* and *SPX3* (*LjUB1p:SPX1- LjUB1p:SPX3*) did not  
321 (significantly) affect *MYB1* expression (Fig. S11E, F), which suggests that SPX1 and SPX3  
322 likely do not function upstream of MYB1 to directly control its expression. The expression of  
323 the hydrolase-encoding gene *CP3* was also not induced upon overexpression of *SPX1&3* and  
324 the expression of *Chitinase* was only weakly affected at low Pi conditions (Fig. S11E, F). The  
325 lack of/weak effect on *CP3* and *Chitinase* expression may be caused by the low expression  
326 levels of MYB1 under non-symbiotic conditions.

327 To investigate a link between SPX1/3 and the MYB1 transcription complex further we  
328 studied whether SPX1 and SPX3 interact with MYB1 or its interacting partners, the GRAS  
329 transcription factors NSP1 and DELLA, which are required for MYB1’s ability to induce *CP3*  
330 and *Chitinase* (Floss et al., 2017). Co-immunoprecipitation analyses of FLAG-tagged SPX1

331 and SPX3 expressed in *Nicotiana benthamiana* leaves together with either GFP-MYB1,  
332 NSP1-GFP or GFP-DELLA1- $\Delta$ 18 (a dominant version of DELLA1 (Floss et al., 2013) failed  
333 to detect a significant interaction between any of these proteins. In contrast, we did detect the  
334 interaction between MYB1 and NSP1 as reported by Floss et al. (2017). Also yeast-two  
335 hybrid analyses did not detect a significant interaction between SPX1/3-AD and MYB-BD or  
336 DELLA1- $\Delta$ 18-BD (data not shown). Expression of NSP1-BD caused the autoactivation of  
337 reporters in our yeast-two-hybrid system preventing the observation of a potential interaction.

338 Our inability to detect significant interactions with the currently known regulators of  
339 arbuscule degradation, suggest that other regulators remain to be identified. Based on the  
340 results obtained in this study we propose the following model (Fig. 7), where SPX1 and SPX3  
341 act as negative regulators of a yet to identify negative regulator of MYB1. This negative  
342 regulation of MYB1 activity likely requires sufficient Pi conditions in the arbuscule  
343 containing cells. When cells have acquired sufficient Pi SPX1/3 will ensure the timely  
344 degradation of the arbuscules.

345

346

## 347 **Discussion**

348 SPX proteins have emerged as key sensors and signaling regulators of cellular phosphate  
349 status in plants (Wild et al., 2016; Wang et al., 2014; Puga et al., 2014; Shi et al., 2014; Hu et  
350 al., 2019). Here we show that the Medicago single SPX-domain proteins SPX1 and SPX3 not  
351 only regulate Pi homeostasis under non-symbiotic conditions, but also regulate root  
352 colonization and arbuscule degradation during AM symbiosis. This offers important novel  
353 insight into the Pi-dependent regulation of this agriculturally and ecologically important  
354 symbiosis.

355 Under non-symbiotic conditions, SPX1 and SPX3 control Pi homeostasis in part through the  
356 regulation of PHR2 activity. In analogy to the situation in *Arabidopsis* and rice, phosphate  
357 starvation leads to the activation of PHR activity to control transcriptional responses. Among  
358 the targets of PHR2 are the *SPX1/3* genes. Both SPX1 and SPX3 can bind PHR2 at high Pi  
359 conditions and negatively affect the PSR response to prevent overaccumulation of Pi. We  
360 show that SPX1 and SPX3 also control the induction of strigolactone biosynthesis gene *D27*  
361 (Liu et al., 2011) under Pi-limiting conditions. This suggests that SPX1 and SPX3 play an  
362 additional positive role in the transcription of Pi-starvation induced genes under low Pi  
363 conditions. This is further supported by the observation that SPX1 and SPX3 play a positive  
364 role in the PSR response at low Pi conditions, in addition to their negative regulation of PSR  
365 at high Pi conditions. Such additional, possibly PHR-independent roles, have also been  
366 suggested for OsSPX3 and OsSPX5 (Shi et al., 2014). Since *D27* plays an essential role in the  
367 biosynthesis of strigolactones (Hao et al., 2009), which activate AM fungi, the role of SPX1  
368 and SPX3 in its induction could explain the lower colonization levels observed in the *spx1*  
369 and *spx3* mutants. This hypothesis is strongly supported by the reduced stimulatory effect of  
370 root exudates from the *spx1* and *spx3* mutant on AM hyphal branching compared to the R108  
371 wild type. However, the current inability to measure strigolactone levels in the R108 genetic  
372 background prevented us from confirming this directly. It would also explain the stimulatory  
373 effect of overexpression of SPX1/3 using the constitutive *LjUBI* promoter on fungal  
374 colonization levels (Fig. 6a). In contrast, overexpression of *SPX1/3* under the control of the  
375 arbuscule-specific *PT4* promoter leads to a decrease in fungal colonization (Fig. 6d). The  
376 arbuscule-specific expression likely prevents the stimulatory effect of SPX1/3 on  
377 strigolactone (or additional metabolites) exudation while still reducing the level of functional  
378 arbuscules leading to overall lower colonization levels.

379 The induction of *SPX1* and *SPX3* upon Pi starvation or *PHR2* overexpression fits with the  
380 presence of the P1BS *cis*-regulatory element in the promoters of these genes. However, after  
381 establishment of the AM symbiosis, the expression of both *SPX1* and *SPX3* becomes  
382 restricted from an ubiquitous expression pattern to specific expression in the arbuscule-  
383 containing cells. This suggests that activity of PHR in the non-colonized root cortical and  
384 epidermal cells is inhibited upon a functional AM symbiosis in a non-cell autonomous manner.  
385 It has been proposed that AM fungi may interfere with the direct phosphate uptake of plants  
386 (Smith et al., 2004; Christophersen et al., 2009; Yang et al., 2012; Wang et al., 2020),  
387 although the mechanisms for this are still unknown. Another possibility is a more systemic  
388 regulation of the phosphate starvation response through hormonal or peptide signaling as the  
389 plant is obtaining Pi from the fungus (Müller and Harrison, 2019). Although we cannot  
390 pinpoint at what time after initiation of the symbiosis, or level of colonization, the shift in  
391 expression exactly occurs based on our analyses, the fact that we hardly see expression in  
392 non-colonized root cells, nor in non-transgenic roots on the same composite plants, already  
393 after 3 weeks of inoculation suggests a rather fast systemic regulation.

394 It is currently not known whether PHR2 is active in arbuscule-containing cells, as contrasting  
395 roles for the P1BS element in the expression of symbiotic phosphate transporters have been  
396 reported (Chen et al., 2011; Lota et al., 2013). However, the presence of SPX1/3 would be  
397 expected to suppress PHR2 activity as it does under non-symbiotic conditions. Instead, the  
398 induction of *SPX1* and *SPX3* in arbuscule-containing cells correlates with the presence of  
399 multiple AW-boxes and CTTC elements in the promoters of both genes. These *cis*-regulatory  
400 elements are found in many genes that are induced in arbuscule-containing cells, and are  
401 bound by WRINKLED1-like TFs that are in turn activated by the key GRAS transcription  
402 factor RAM1 that controls arbuscule formation (Jiang et al., 2018; Xue et al., 2018; Limpens  
403 and Geurts, 2018; Pimprikar et al., 2018). A link between RAM1, WRI5a and *SPX3*  
404 expression is further supported by the lack of *SPX3* induction in the *ram1* mutant (table S3)  
405 (Luginbuehl et al., 2017). However, this hypothesis still requires further experimental  
406 confirmation.

407 Since Pi levels are most likely not limiting in cells containing active arbuscules, the impaired  
408 induction of *CP3* and *Chitinase* and associated arbuscule degradation in the *spx1spx3* double  
409 mutant argues for the involvement of SPX1/3 interacting proteins other than PHR2. The  
410 observation that *MYB1* overexpression was able to trigger premature arbuscule degradation in  
411 the *spx1spx3* double mutant indicates that MYB1 can bypass SPX1/3 to induce arbuscule

412 degradation. We were unable to detect a significant interaction between SPX1 or SPX3 with  
413 the currently known regulators of arbuscule degradation, MYB1 and its interacting partners  
414 NSP1 and DELLA (Floss et al., 2017). This leaves us with the question how SPX1 and SPX3  
415 might control arbuscule degradation? Based on our findings we propose that SPX1 and SPX3  
416 negatively regulate a yet unknown negative regulator of MYB1 activity in a Pi-dependent  
417 manner (Fig. 7). *MYB1* expression is already strongly induced at an early stage of arbuscule  
418 formation, most likely due to the RAM1-WRI5 transcriptional cascade. However this  
419 induction does not lead to the degradation of the arbuscules (Floss et al., 2017). Therefore, it  
420 seems that the activity of MYB1 is suppressed as long as the fungus provides (sufficient) Pi to  
421 the host cell. Ectopic overexpression of *MYB1* can trigger the premature degradation of the  
422 arbuscules suggesting that the proposed negative regulator is not expressed yet or that high  
423 MYB1 levels can override the negative regulation. SPX1 and SPX3 are predicted to sense the  
424 amount of Pi proved by the fungus in the arbuscule-containing cells. If Pi levels exceed the  
425 demand SPX1 and SPX3 can redundantly inhibit the negative regulation of MYB1 activity  
426 thereby terminating the arbuscule.

427 It is tempting to speculate that SPX proteins may also be involved in the cross-talk with other  
428 nutrients supplied by the fungus, such as nitrogen. This suggestion is based on the  
429 involvement of OsSPX4 in nitrate signaling to activate the phosphate starvation response (Hu  
430 et al., 2019) and the reported nitrogen-control of arbuscule development (Breuillin-Sessoms et  
431 al., 2015). For example, the premature arbuscule degradation in the *pt4* mutant was also  
432 suppressed when the plants were grown under N-limiting conditions (Breuillin-Sessoms et al.,  
433 2015). This was shown to depend on the ammonium transceptor AMT2;3. It will therefore be  
434 interesting to test whether SPX1 and SPX3 contribute to this nutrient crosstalk in Medicago.

435 In conclusion, we reveal novel roles for phosphate sensing SPX proteins in the regulation of  
436 AM symbiosis to enhance the phosphate acquisition efficiency of plants. SPX proteins show  
437 both a role in the initiation of the symbiosis, likely in part through their effect on the  
438 expression of the strigolactone biosynthesis gene *D27*, as well as a role in the termination of  
439 the symbiosis by controlling the degradation of arbuscules. The latter role can be essential to  
440 maintain the beneficial nature of the interaction. In nature plants are most often colonized by  
441 multiple different AM strains that can differ in the amount of nutrients they supply (Kiers et  
442 al., 2011). Therefore SPX proteins can provide a means to locally monitor whether a fungal  
443 partner provides sufficient nutritional benefits. Further unraveling how nutrient sensing and  
444 homeostasis are regulated during AM symbiosis will be pivotal to understand the ecological



445 workings of this key symbiosis and how to best exploit it for more sustainable agriculture  
446 practices.

447

## 448 **Materials and methods**

### 449 **Plant and fungal material**

450 *Medicago truncatula* A17 and R108 seedlings were grown and transformed as described  
451 (Limpens et al., 2004). The *spx1* (NF13203) and *spx3* (NF4752) Tnt1-insertion lines were  
452 obtained from the Noble Research Institute ([https://medicago-](https://medicago-mutant.noble.org/mutant/index.php)  
453 [mutant.noble.org/mutant/index.php](https://medicago-mutant.noble.org/mutant/index.php)). Homozygous *spx1* and *spx3* mutants were identified by  
454 PCR and crossed to obtain the *spx1/spx3* double mutant. Primers used are listed in Table S1.  
455 Plants were grown in SC10 RayLeach cone-tainers (Stuewe and Sons, Canada) with premixed  
456 sand:clay (1:1 V/V) mixture and watered with 10 ml ½ Hoagland medium with 20 µM (low  
457 Pi) or 500 µM H<sub>2</sub>PO<sub>4</sub> (high Pi) twice a week in a 16 h daylight chamber at 21°C, as described  
458 previously (Zeng et al., 2018). *Rhizophagus irregularis* DAOM197198 spores (Agronutrition,  
459 France) were washed through three layers of filter mesh (220 µm, 120 µm, 38 µm) before  
460 inoculation. 200 pores were placed ~2 cm below seedling roots.

### 461 **Phylogeny**

462 SPX phylogenetic analysis was performed using the Geneious R11.0 software package  
463 (<https://www.geneious.com>). *Medicago*, *Arabidopsis* and rice SPX protein sequences were  
464 collected from PLAZA (<https://bioinformatics.psb.ugent.be/plaza/>) and aligned using MAFFT  
465 in Geneious R11.0. An unrooted SPX phylogenetic tree was generated using the neighbour-  
466 joining tree builder with 500 bootstraps.

### 467 **Constructs**

468 Most constructs were made using the Golden gate cloning system (Engler et al., 2014)  
469 Constructs for RNAi were made via Gateway cloning and constructs for Y2H experiments  
470 were made using in fusion cloning (Takara, Japan). Primers used are listed in Table S1.  
471 Vectors used for cloning are listed in table S2. All newly made vectors were confirmed by  
472 Sanger sequencing.

### 473 **GUS histochemical analyses**

474 To create the *MtSPX1p-GUS* and *MtSPX3p-GUS* constructs, a 1824 bp upstream of the  
475 *MtSPX1* (Medtr3g107393) ATG start codon and a 1260 bp upstream of the *MtSPX3*  
476 (Medtr0262s0060) ATG start codon was amplified by PCR from *M. truncatula* A17 genomic  
477 DNA as promoter, respectively. *MtSPX1p-GUS* and *MtSPX3p-GUS* constructs were  
478 introduced into Medicago plants using *Agrobacterium rhizogenes*-mediated root  
479 transformation (Limpens et al., 2004). GUS staining was done as described (An et al., 2019).  
480 Briefly, transgenic roots were harvested based on DsRed fluorescence (red fluorescent marker  
481 present in the constructs) and washed twice with PBS buffer for 10 min. Next, the roots were  
482 incubated in GUS reaction buffer (3% sucrose, 10mM EDTA, 2 mM potassium-ferrocyanide,  
483 2 mM potassium-ferricyanide and 1 mg/ml X-Gluc in 100mM PBS, pH 7.0) for 30 min in  
484 vacuum, and then incubated at 37°C for 1 h. The stained roots were fixed in fixation buffer (5%  
485 glutaraldehyde in 100mM phosphate buffer, pH 7.2) for 2 h in vacuum at room temperature,  
486 followed by dehydrating with an ethanol series (20%, 30%, 50%, 70%, 90%, 100%) for 10  
487 min each. Root segments were embedded in Technovit 7100 (Hereus-Kulzer, Germany) and  
488 cut into 8 µm longitudinal sections using a microtome (Leica RM2255) and stained with 0.1%  
489 Ruthenium Red for 5 min. Images were taken using an Leica DM5500 B microscope.

#### 490 **Co-immunoprecipitation and western blotting**

491 FLAG-tagged SPX1 and SPX3 and GFP-tagged PHR2 (Medtr1g080330) constructs were  
492 transiently expressed in *Nicotiana* leaves as described (Zeng et al., 2018). Total proteins were  
493 isolated using Co-IP buffer (10% glycerol, 50 mM Tris-Hcl pH=8.0, 150 mM NaCl, 1%  
494 Igepal CA 630, 1 mM PMSF, 20 µM MG132, 1 tablet protease inhibitor cocktail). GFP-Trap  
495 agarose beads (Chromotek) were used to immunoprecipitate GFP protein complexes. Western  
496 blot was performed as described (Bungard et al., 2010). 1:5000 diluted anti-GFP-HRP and  
497 anti-FLAG-HRP antibodies (Miltenyi biotec, USA) were used for detection.

#### 498 **RNA interference**

499 A *SPX1SPX3* hairpin construct was generated targeting both *SPX1* and *SPX3* mRNA using  
500 the Gateway system (Invitrogen, USA). 534 bp of *SPX1* and 489 bp of *SPX3* mRNA  
501 sequence were combined together by overlap PCR and the resulting 1023 bp sequence was  
502 cloned into the pENTR/D-TOPO entry vector. Primers used are listed in table S1. the.  
503 Subsequently, the modified pK7GWIWG2(II)-AtEF1 RR vector (Zeng et al., 2020) was used  
504 for an LR reaction to get the final hairpin silencing construct.

## 505 **Pi concentration measurement**

506 Shoots inorganic Pi concentration was measured as described (Zhou et al., 2008). Briefly,  
507 Medicago shoots were crushed to a fine powder in liquid nitrogen, and rigorously vortexed for  
508 1 min in 1 mL 10% (w/v) of perchloric acid. The homogenate was diluted 10 times by 5%  
509 (w/v) perchloric acid and then put on ice for 30 min, followed by centrifugation at 10,000g for  
510 10 min at 4°C to collect the supernatant. The molybdenum blue method was used to measure  
511 Pi content in the supernatant. To prepare the molybdenum blue solution, 6 mL solution A (0.4%  
512 ammonium molybdate dissolved in 0.5 M H<sub>2</sub>SO<sub>4</sub>) was mixed with 1 mL 10% ascorbic acid. 2  
513 mL of molybdenum blue solution was added to 1 mL of the sample supernatant, and  
514 incubated in a water bath for 20 min at 42°C. Then the absorbance was measured at 820 nm ,  
515 and Pi content was calculated by comparison to standard curve. The Pi concentration was  
516 normalized to the shoot fresh weight.

## 517 **RNA isolation and qRT-PCR**

518 RNA was isolated using the Qiagen plant RNA mini kit according to the manufacturer's  
519 instructions, including an on column DNase treatment. cDNA was made using the iScript  
520 cDNA Synthesis kit (Bio-Rad) using 300 ng total RNA as template. qRT-PCR was performed  
521 using the iQ SYBR Green Supermix (Bio-Rad) in a Bio-Rad CFX connect real-time system.  
522 Primers used for qPCR are listed in Table S1. Medicago Elongation factor 1 (*EF1*) was used  
523 as reference for normalization. Relative expression levels were calculated as  $2^{-\Delta\Delta ct}$  with three  
524 technical replicates for each sample.

## 525 **AM quantification**

526 Mycorrhizal roots were stained using WGA-Alexafluor 488 (Thermo Fisher Scientific, USA).  
527 AM quantification was performed as described (McGONIGLE et al., 1990). In short, a Leica  
528 DM5500 B microscope equipped with an eyepiece crosshair was used to inspect the  
529 intersections between the crosshair and roots at 200x magnification. The following categories  
530 were noted in each intersection: root only, hyphopodium, extraradical hyphae, intracellular  
531 hyphae (Intrahyphae), good arbuscule (equal or larger than 40 μm), degrading arbuscule (less  
532 than 40 μm, and presence of septa). In cases where at one intersection more than one category  
533 was observed, then each category was counted once at that position. 100 intersections were  
534 inspected for each sample (containing 30 cm root) and the percentage of each category was  
535 calculated.

### 536 **Root exudate collection and quantification of strigolactones**

537 Strigolactone analysis was done as described (van Zeijl et al., 2015; Liu et al., 2011). 6  
538 seedlings of each genotype were grown in a X-stream 20 aeroponic system (Nutriculture)  
539 operating with 5 L of ½ Hoagland medium (Hoagland, 1950) containing 500 µM Pi in a  
540 greenhouse with natural light, 28 °C, 60% relative humidity. After 4 weeks, Pi starvation was  
541 initiated by replacing the high Pi medium with ½ Hoagland medium containing 20 µM Pi for  
542 one week. 24 hours before exudate collection, the medium was refreshed with new low Pi ½  
543 Hoagland medium. The 5 liters containing 24-hour exudate were purified and concentrated  
544 by loading to a pre-equilibrated C18 column (Grace Pure C18-Fast 5000 mg/20 mL). Next,  
545 the column was washed with 50 mL of deionized water, followed by 50 mL of 30% acetone.  
546 Next, strigolactones were eluted with 50 mL 60% acetone and measured using a Quadcore as  
547 described (Kohlen et al., 2011).

### 548 ***R. irregularis* branching assay**

549 *R. irregularis* spore germination and branching assays were performed as previously  
550 described (Besserer et al., 2006; Tsuzuki et al., 2016). 100 spores were grown on Solid M  
551 medium (BÉCARD and FORTIN, 1988) with 0.6% acetone, 0.01 µM GR24 or 100 times  
552 diluted root exudates (as collected above) in the dark at 22°C. 8 days after inoculation, hyphal  
553 branches were counted using a Leica M165 FC microscope.

### 554 **Confocal microscopy**

555 The subcellular localization of fluorescently tagged proteins and detailed observation of the  
556 arbuscules using WGA-Alexafluor 488 stained roots were analysed using a Leica SP8  
557 confocal microscope (For GFP/Alexafluor 488: excitation 488 nm, emission 500-540 nm; for  
558 DsRED/mCherry: excitation 552, emission 580-650 nm).

### 559 **Statistical analyses**

560 For pairwise comparisons, data were analyzed using T-Test built in EXCEL with tail 1, type 2.  
561 One-way ANOVA built in Origin 2018 software was used to test difference over two groups  
562 of data with default settings. Replicates per experiment used are indicated in the  
563 corresponding figure legends.

564

565 **Acknowledgments**

566 P.W. is supported by the China Scholarship Council (CSC) grant 201606310038 and by the  
567 Dutch research school Experimental Plant Sciences (EPS). We would like to thank Rene  
568 Geurts for critical reading and comments on the manuscript.

569

570 **Author Contributions**

571 P.W. and E.L. conceived and designed experiments. P.W., R.S., and W.K.. performed  
572 experiments and/or data analyses. J.L. performed crossing. P.W., T.B. and E.L. wrote the  
573 manuscript.

574

575 **Competing Interest Statement**

576 The authors declare no conflict of interest.

577

578

579 **Figures**

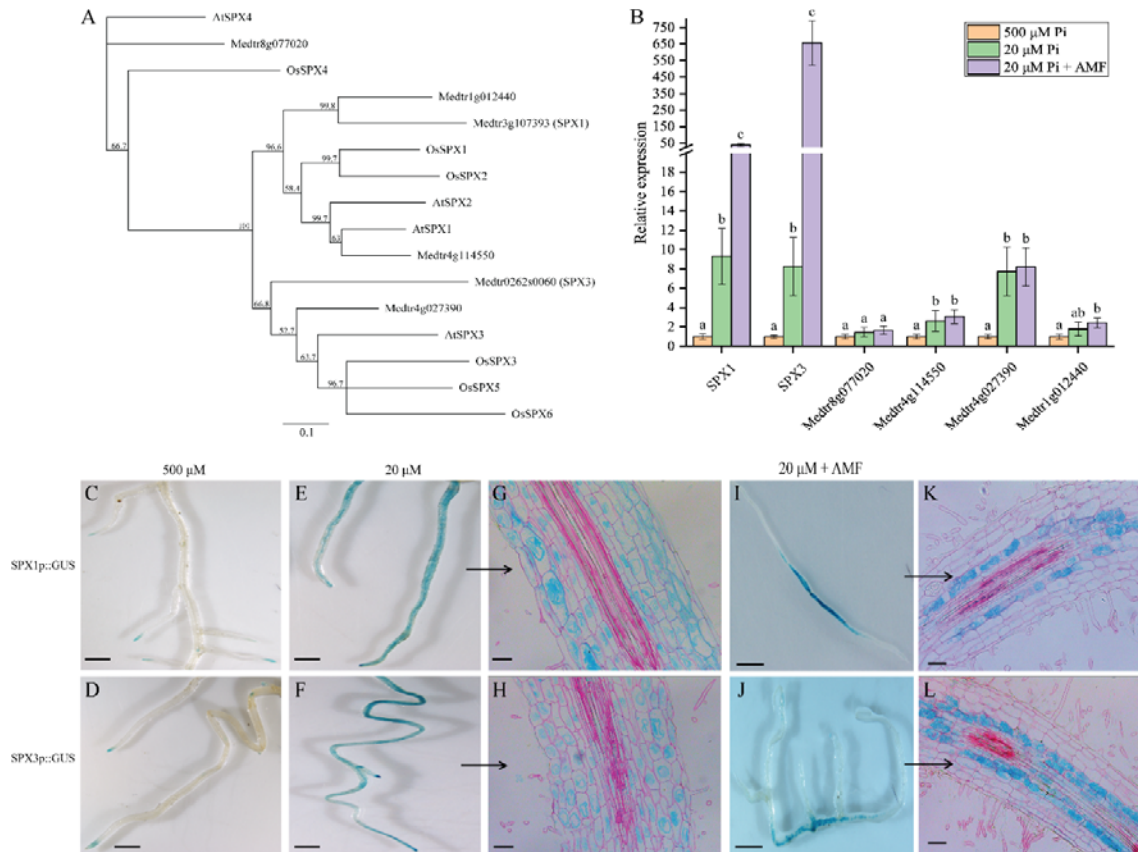

580

581 **Fig. 1** *Medicago SPX1* and *SPX3* induced by phosphate starvation and arbuscular mycorrhizal  
582 fungi. (A) Phylogenetic relationship of SPX proteins in *Medicago*, *Arabidopsis* and *Rice*.  
583 Unrooted tree constructed using Geneious R11.0 by neighbour-joining method with bootstrap  
584 probabilities based on 500 replicates. The identifiers of *Arabidopsis* and *rice* SPX proteins are  
585 listed in Table S4. (B) qRT-PCR analyses of *Medicago SPX* expression at high Pi (500  $\mu$ M),  
586 low Pi (20  $\mu$ M) and arbuscular mycorrhizal (20  $\mu$ M Pi plus AM fungi (AMF)) conditions.  
587 *SPX1* (Medtr3g107393) and *SPX3* (Medtr0262s0060) are induced at low Pi conditions, and  
588 even stronger upon symbiosis with AMF. *Medicago Elongation factor 1 (MtEF1)* was used as  
589 internal reference, error bars indicate standard error of the mean based on 3 individual plants.  
590 Different letters indicate significant differences between treatments (one-way ANOVA,  $P <$   
591 0.05). (C-D) *SPX1* and *SPX3* are expressed in root tips at 500  $\mu$ M Pi. Scale bar =1 cm. (E-H)  
592 *SPX1* and *SPX3* at 20  $\mu$ M Pi, (G) and (H) are longitudinal sections of (E) and (F). Sections are  
593 counterstained with 0.1% ruthenium red. Scale bar in (C-D), 1 cm, in (E-F), 100  $\mu$ m. (I-L)  
594 *SPX1* and *SPX3* are highly and specifically induced in arbuscule-containing cortical cells (3

595 weeks post-inoculation). (K) and (L) are longitudinal sections of (I) and (J). Scale bar in (I-J),  
596 1 cm, in (K-L), 100  $\mu\text{m}$ .

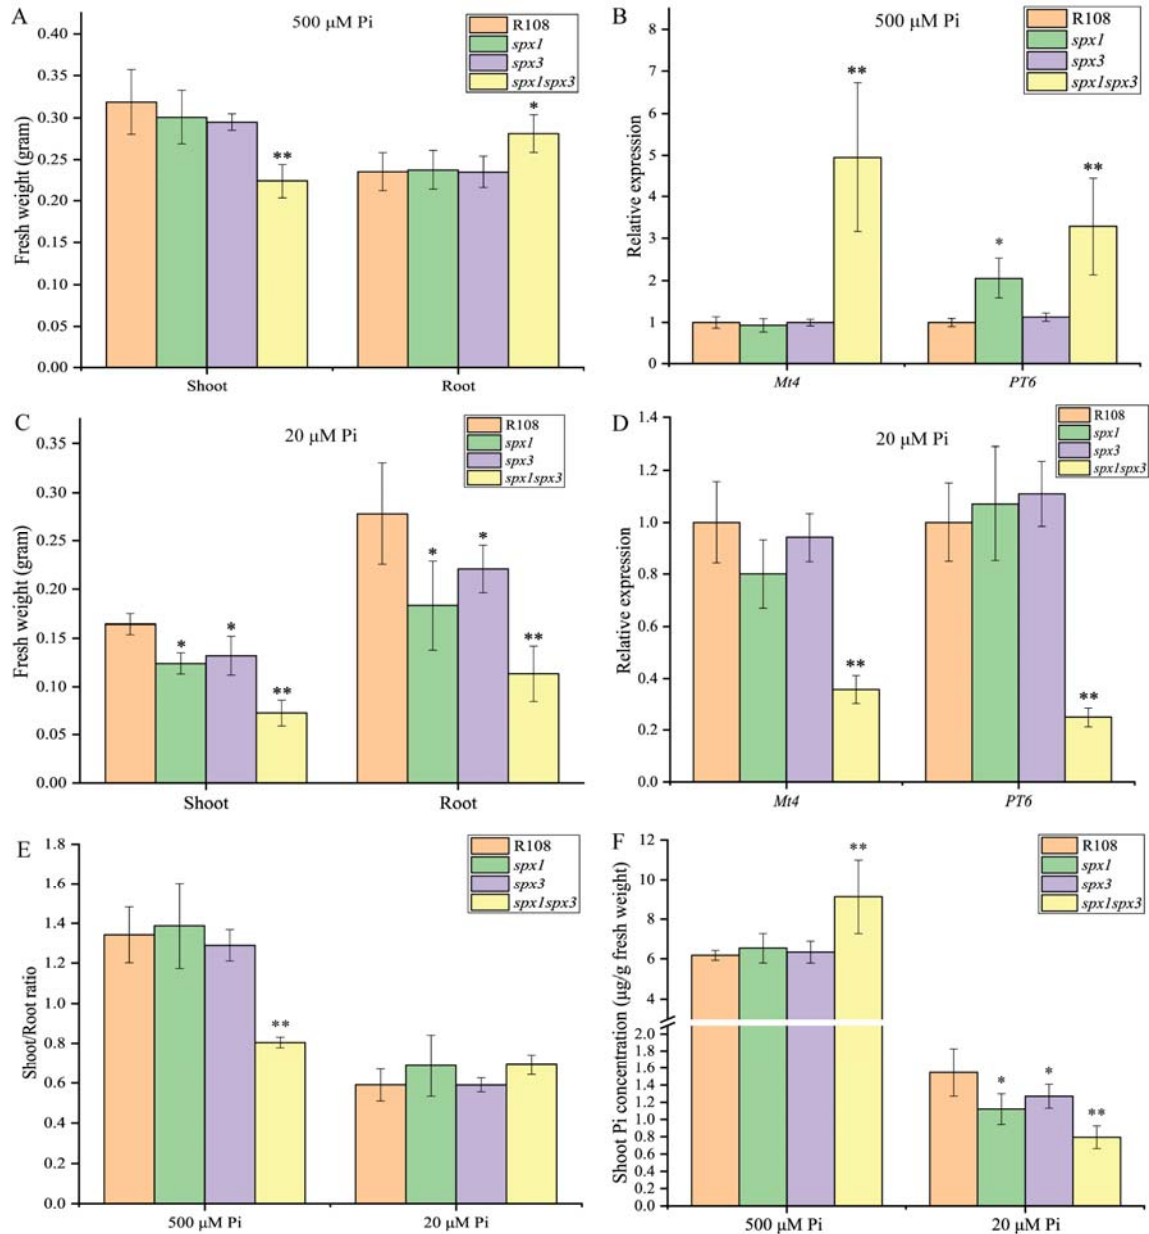

597

598 **Fig. 2** SPX1 and SPX3 regulate Pi homeostasis. (A) Fresh weight of wild type R108, *spx1*,  
 599 *spx3* and *spx1spx3* plants grown for 3 weeks at 500 μM Pi. (B) Relative expression of *Mt4*  
 600 and *PT6* in root samples shown in (A) as determined by qPCR. *MtEF1* is used as reference  
 601 gene. (C) Fresh weight of wild type R108, *spx1*, *spx3* and *spx1spx3* plants grown for 3 weeks  
 602 at 20 μM Pi condition. (D) Relative expression of *Mt4* and *PT6* in the root samples shown in  
 603 (C). (E) Shoot-to-Root ratio of R108, *spx1*, *spx3* and *spx1spx3* plants shown in (A, C). (F)  
 604 Shoot cellular Pi concentrations in R108, *spx1*, *spx3* and *spx1spx3* plants from (A, C). All  
 605 values represent mean ± standard error of 5 replicate plants. Data significantly different from



606 the corresponding R108 wild-type controls are indicated \*  $P < 0.05$ ; \*\*  $P < 0.01$  (Student's t-  
607 test).

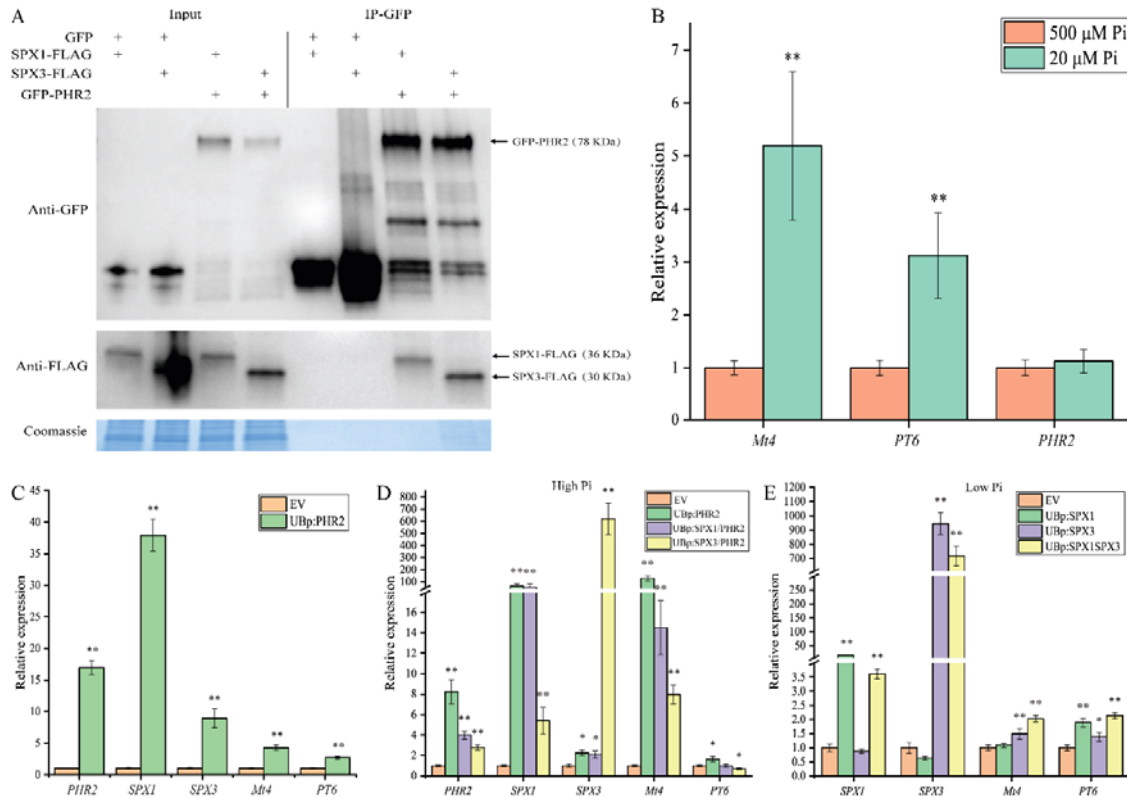

608

609 **Fig. 3** SPX1 and SPX3 interact with PHR2 to regulate phosphate homeostasis. (A) Western  
610 blot of co-immunoprecipitation samples showing SPX1 and SPX3 interaction with PHR2.  
611 FLAG-tagged SPX1 or SPX3 were co-expressed with free GFP or GFP-tagged PHR2 in  
612 *Nicotiana* leaves. Immunoprecipitation (IP) of GFP-tagged proteins shows the co-IP of the  
613 FLAG-tagged SPX proteins. Coomassie brilliant blue staining shows total protein levels as  
614 loading control. (B) qPCR analysis showing phosphate starvation induced *Mt4* and *PT6*  
615 expression, but not of *MtPHR2* expression in Medicago roots. Data represent mean  $\pm$  standard  
616 error of 3 replicate plants. Data significantly different from 500  $\mu$ M Pi conditions are  
617 indicated \*\*  $P < 0.01$  (Student's t-test). (C) qPCR analysis showing that overexpression of  
618 *MtPHR2* (*LjUBp::PHR2*) induced *SPX1*, *SPX3*, *Mt4* and *PT6* expression in transgenic roots  
619 grown for 4 days at low Pi conditions. (D) qRT-PCR results showing that overexpression  
620 (using the *LjUB1* promoter) of *SPX1* or *SPX3* together with *PHR2* in high Pi conditions  
621 induced *Mt4* and *PT6* expression less than overexpression of *PHR2* alone. (E) qPCR results  
622 showing that overexpression of *SPX1/3* at low Pi conditions induced *Mt4* and *PT6* expression.  
623 All values in (C-E) represent mean  $\pm$  standard error of 3 independently transformed roots.

624 Data significantly different from the corresponding EV transformed controls are indicated \* P  
 625 < 0.05; \*\* P < 0.01 (Student's t-test). *MtEF1* was used as reference gene for normalization.

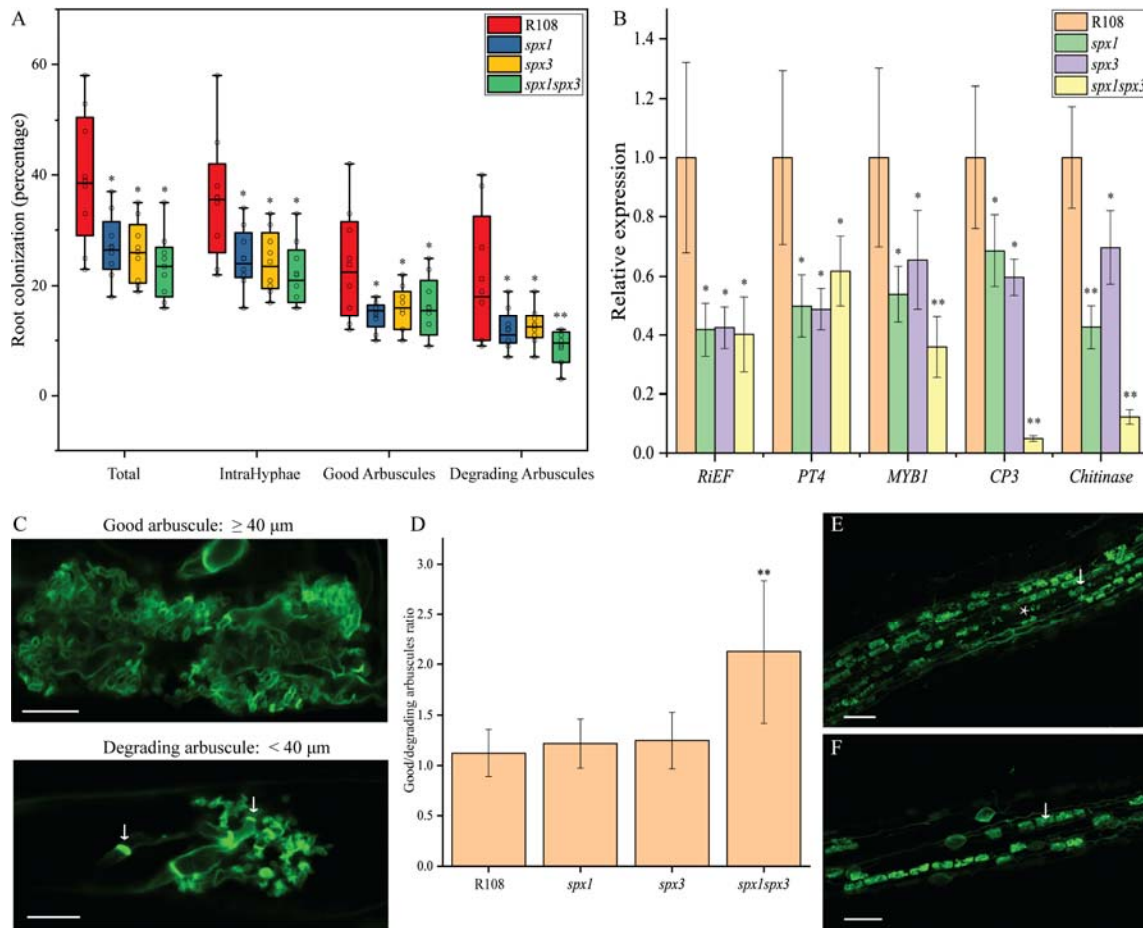

626

627 **Fig. 4** SPX1 and SPX3 regulate AM colonization and arbuscule degeneration. (A)  
 628 Quantification of mycorrhization levels in wild type R108, *spx1*, *spx3* and *spx1spx3* 3 weeks  
 629 post inoculation with *R. irregularis*. 8 independently transformed roots were used as replicas  
 630 for each sample. Quantification was performed using the magnified intersections method  
 631 (McGONIGLE et al., 1990). Good arbuscule: larger or equal to 40  $\mu$ m; Degrading arbuscules:  
 632 smaller than 40  $\mu$ m with septa (white arrow in C). Data significantly different from R108  
 633 wild-type controls are indicated \* P < 0.05; \*\* P < 0.01 (Student's t-test). (B) Expression  
 634 levels of *RiEF*, *PT4*, *CP3*, *Chitinase* and *MYB1* in root samples from (A) determined by  
 635 qPCR analyses. *MtEF1* was used as internal reference. Values represent mean  $\pm$  standard  
 636 error. Data significantly different from R108 wild-type controls are indicated \* P < 0.05; \*\* P  
 637 < 0.01 (Student's t-test). (C) Representative images of good arbuscule and degrading  
 638 arbuscules in WGA-Alexa488 stained roots 3 weeks post-inoculation. Arrow points to septa.  
 639 Scale bar = 10  $\mu$ m. (D) Good-to-degrading arbuscule ratio of R108, *spx1*, *spx3* and *spx1spx3*  
 640 mycorrhizal samples from (A). Values represent mean  $\pm$  standard error of 8 independently  
 641 transformed roots. Data significantly different from R108 wild-type controls are indicated \*\*

642 P < 0.01 (Student's t-test). (E) and (F) Representative images of WGA-Alexa488 stained *R.*  
643 *irregularis* in R108 and *spx1spx3*. White arrow marks a good arbuscule. Asterisk marks a  
644 degrading arbuscule. Scale bar = 100  $\mu$ m.

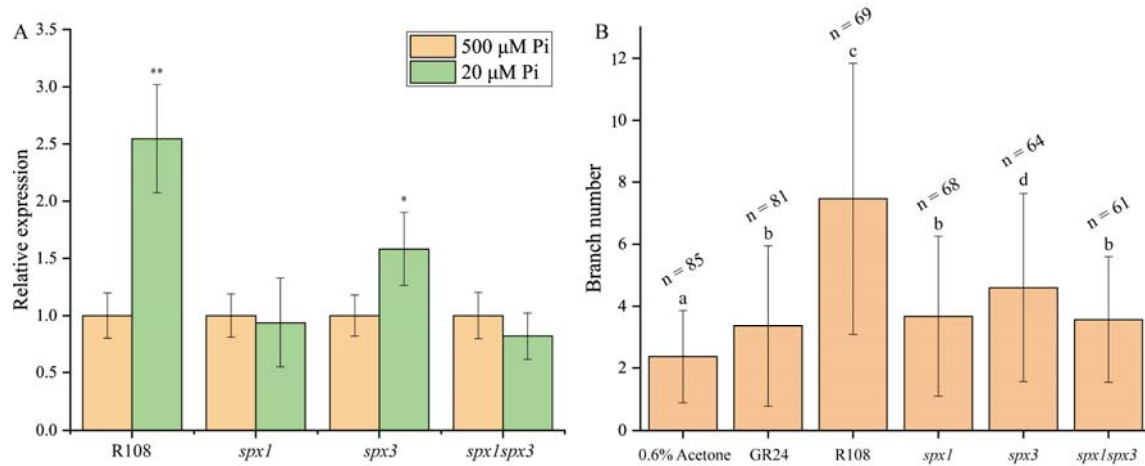

645

646 **Fig. 5** SPX1 and SPX3 regulate expression of strigolactone biosynthesis gene *D27*. (A) The  
647 induction of *D27* expression in low Pi conditions is impaired in *spx1*, *spx3*, and *spx1spx3*  
648 mutants. Values represent mean  $\pm$  standard error of 3 individual plant replicates. Data  
649 significantly different from corresponding controls are indicated \*  $P < 0.05$ ; \*\*  $P < 0.01$   
650 (Student's t-test). (B) *R. irregularis* spores treated with root exudates of R108, *spx1*, *spx3* and  
651 *spx1spx3* for 8 days. 0.01  $\mu$ M GR24 and 0.6% acetone were respectively used as positive and  
652 negative controls. Hyphal branch numbers in spores treated with root exudates of *spx1*, *spx3*  
653 and *spx1spx3* mutants are significantly lower compared to spores treated with R108 root  
654 exudates. n indicates the number of spores counted. Error bars indicate standard error,  
655 different letters indicate significant difference between treatments (one-way ANOVA,  $P <$   
656 0.05).

657

658

659

660

661

662

663

664

665

666

667

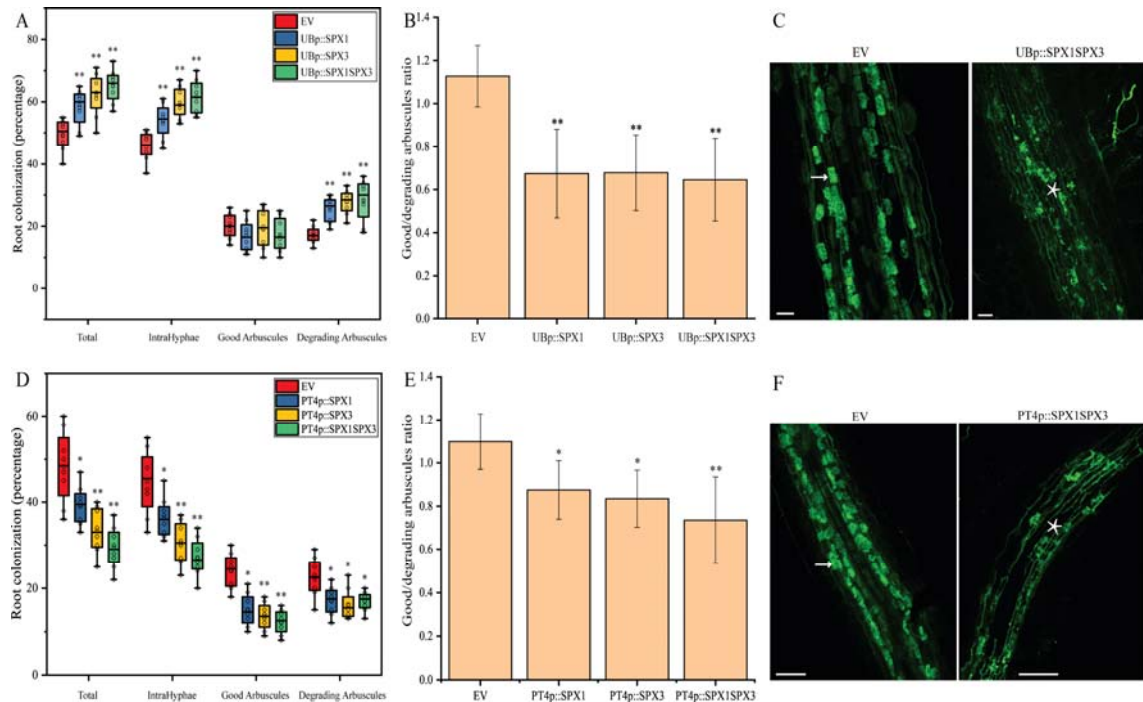

668

669 **Fig. 6** Overexpression of *SPX1/3* under the control of the *LjUbiquitin* or *MtPT4* promoter  
670 increased AM colonization and/or arbuscule degradation. (A) Quantification of  
671 mycorrhization level in *M. truncatula* roots expressing EV, *UBp::SPX1*, *UBp::SPX3*, and  
672 *UBp::SPX1-UBp::SPX3* 3 weeks post inoculation with *R. irregularis*. 8 independently  
673 transformed plants were used as replicas for each sample. Quantification was performed using  
674 the magnified intersections method (McGONIGLE et al., 1990). (B) Good-to-Degrading  
675 arbuscule ratio of EV, *UBp::SPX1*, *UBp::SPX3* and *UBp::SPX1-UBp::SPX3* mycorrhizal  
676 samples from (A). Values represent mean  $\pm$  standard deviation of 8 independently  
677 transformed roots. (C) Representative confocal images of WGA-Alexa488 stained *R.*  
678 *irregularis* in EV and *UBp::SPX1-UBp::SPX3* roots. White arrow marks a good arbuscule.  
679 Asterisk marks a degrading arbuscule. Scale bar = 80  $\mu$ m. (D) Quantification of  
680 mycorrhization level in *M. truncatula* roots expressing EV, *PT4p::SPX1*, *PT4p::SPX3* and  
681 *PT4p::SPX1-PT4p::SPX3* 3 weeks post inoculation with *R. irregularis*. 8 independently  
682 transformed plants were used as replicas for each sample. Quantification was performed using  
683 the magnified intersections method (McGONIGLE et al., 1990). (E) Good-to-Degrading  
684 arbuscule ratio of EV, *PT4p::SPX1*, *PT4p::SPX3* and *PT4p::SPX1-PT4p::SPX3* mycorrhizal  
685 samples from (D). Values represent mean  $\pm$  standard deviation of 8 independently  
686 transformed roots. (F) Representative confocal images of WGA-Alexa488 stained *R.*  
687 *irregularis* in EV and *PT4p::SPX1-PT4p::SPX3* roots. White arrow marks a good arbuscule.  
688 Asterisk marks a degrading arbuscule. Scale bar = 100  $\mu$ m. All data in (A, B, D, E)  
689 significantly different from the corresponding EV controls are indicated \*  $P < 0.05$ ; \*\*  $P <$   
690 0.01 (Student's t-test).

691

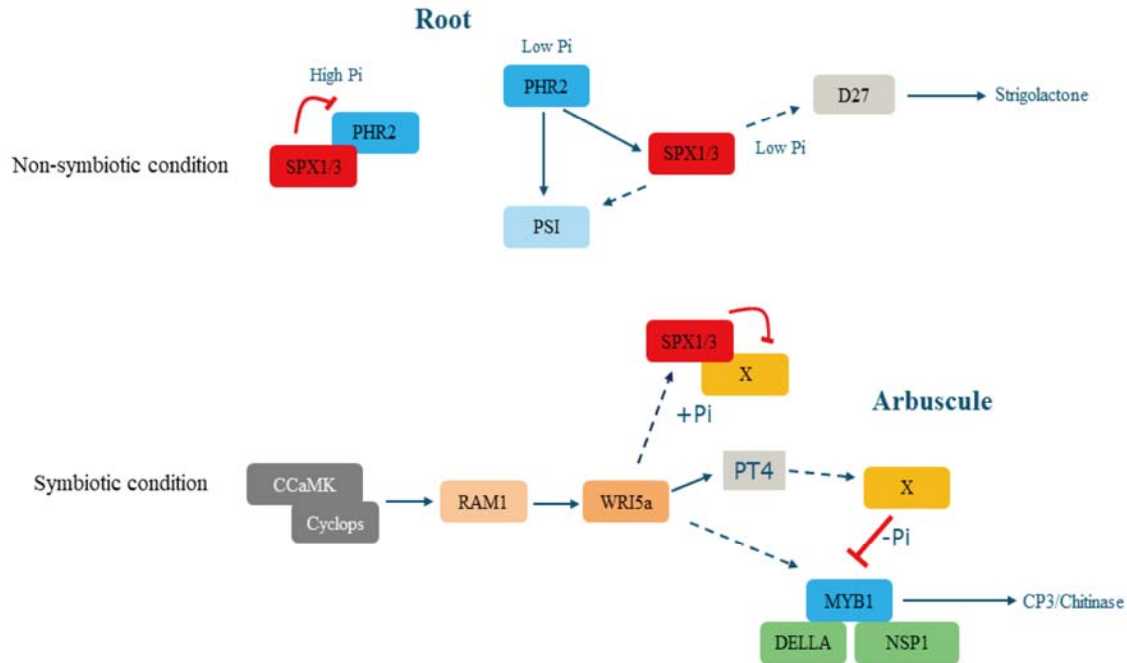

692

693 **Fig. 7** Proposed model for SPX1/3 function. In high Pi conditions, SPX1 and SPX3 interact  
 694 with PHR2, inhibiting PHR2-induced PSI gene expression. In low Pi conditions, PHR2  
 695 induces phosphate starvation induced (PSI) genes as well as *SPX1/3* expression. SPX1 and  
 696 SPX3 play a positive role in the expression of PSI genes (*Mt4* and *PT6*) and *D27*. *D27* is a  
 697 key gene involved in strigolactone biosynthesis. Strigolactones act as signaling molecules to  
 698 enhance the growth and metabolism of AM fungi. In symbiotic conditions, SPX1 and SPX3  
 699 redundantly regulate arbuscule degeneration likely through an yet-to-be-identified factor X,  
 700 which negatively regulate MYB1 activity. *SPX1* and *SPX3* are induced by the RAM1-WRI5  
 701 transcriptional cascade that also induces *PT4* and *MYB1* expression. The activity of X is  
 702 suppressed by binding of SPX1/3 in Pi-dependent manner. This relieves the inhibition of  
 703 MYB1 activity that, together with DELLA and NSP1 transcription factors, induces arbuscule  
 704 degradation genes such as *CP3* and *Chitinase* leading to arbuscule degradation. Red lines  
 705 indicate Pi dependent negative regulation at the protein level. Solid arrows indicate known  
 706 transcriptional induction. Dashed arrows indicate direct/indirect transcriptional regulation  
 707 based on the data presented.

708

709 **Supplementary data**

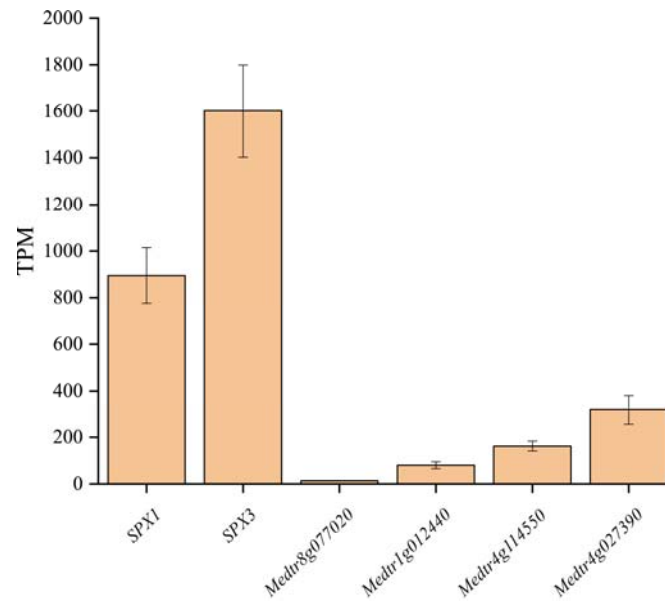

710

711 **Fig. S1** *SPX1* and *SPX3* are highly expressed in arbuscule-containing cells. RNAseq data of laser microdissected  
712 *Medicago* roots colonized by *R. irregularis* showing that *SPX1* and *SPX3* are the dominant SPX members  
713 expressed in arbuscule-containing cells. Data collected from (Zeng et al., 2018). TPM= transcripts per million.

714

715

716

717

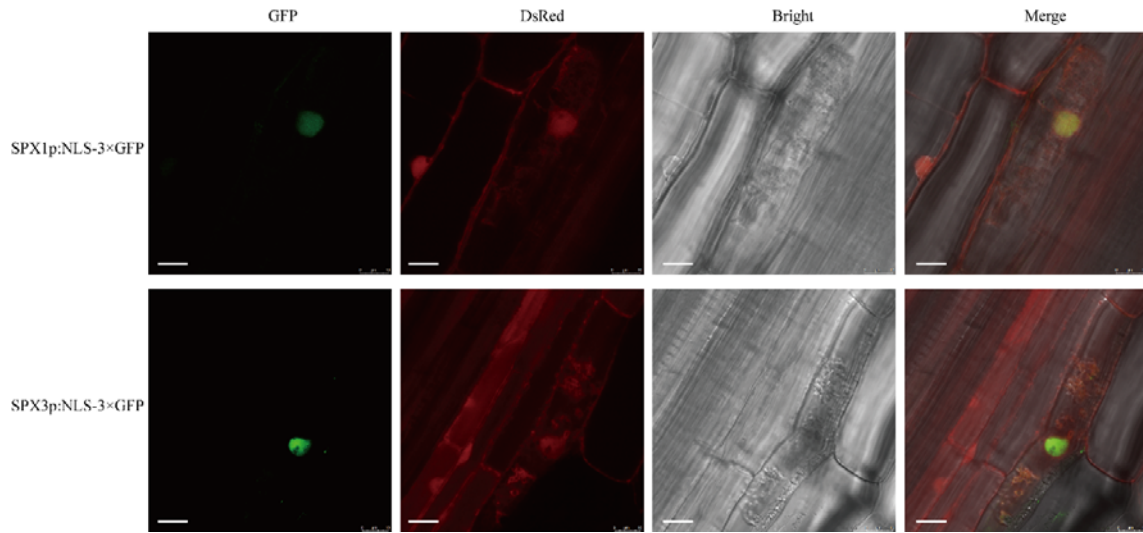

718

719 **Fig. S2** *SPX1* and *SPX3* specifically expressed in arbuscule-containing cell. Upper panels: Confocal images of  
720 nuclear localization signal (NLS)-3×GFP expressed from the *SPX1* promoter in mycorrhizal *Medicago*  
721 *truncatula* roots. Bottom panels: Confocal images of NLS-3×GFP expressed from the *SPX3*. A co-expressed  
722 *UBp::DsRed* marker localizes to the nucleus and cytoplasm. Different panels represent the following channels  
723 (from left to right): GFP, DsRED, Bright field and all channels merged. GFP signal can only be detected in  
724 arbuscule-containing cell, while DsRed signal can be detected in neighboring non-colonized cortex cells. Scale  
725 bar = 10  $\mu$ m.



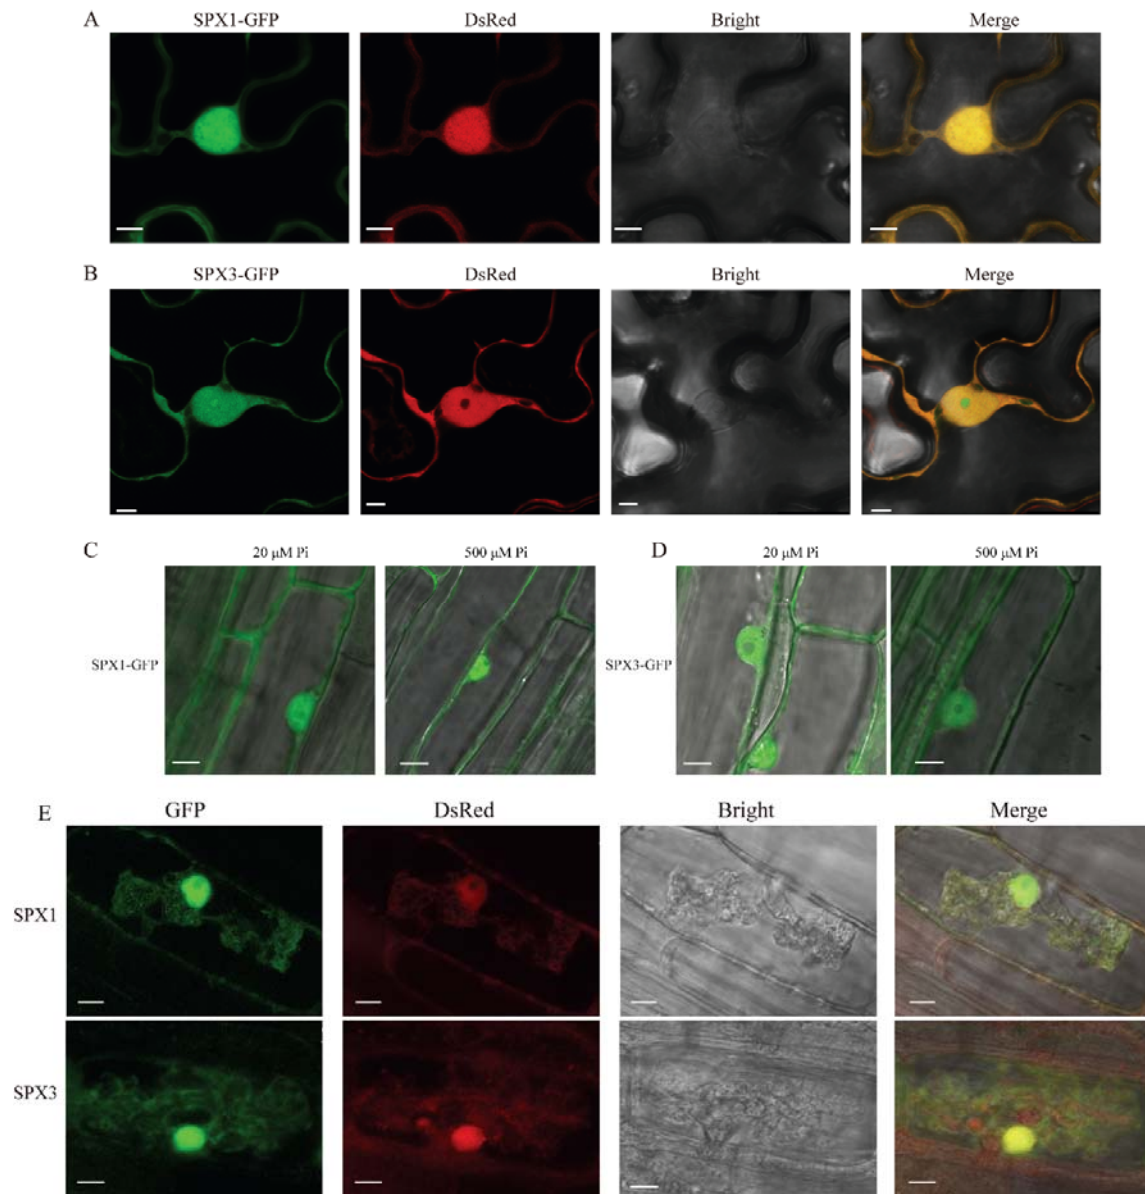

726

727 **Fig. S3** SPX1 and SPX3 localise to the nucleus and cytoplasm. (A) Confocal images of SPX1-GFP expressed  
728 from a constitutive *LjUbiquitin* promoter in *Nicotiana benthamiana* leaves. A co-expressed *UBp::DsRed* marker  
729 localizes to the nucleus and cytoplasm. Different panels represent the following channels (from left to right):  
730 GFP, DsRED, Bright field and all channels merged Scale bar = 8  $\mu$ m. (B) Confocal images of *LjUBp::SPX3-*  
731 *GFP* in *Nicotiana benthamiana* leaves Scale bar = 5  $\mu$ m. (C) Confocal images of *LjUBp::SPX1-GFP* in  
732 *Medicago truncatula* roots localizing to the nucleus and cytoplasm in low Pi and high Pi conditions. Scale bar =  
733 10  $\mu$ m. (D) Confocal images of *LjUBp::SPX3-GFP* expressed in *Medicago truncatula* roots in low Pi and high  
734 Pi conditions. Scale bar = 8  $\mu$ m. (E) Confocal images of SPX1-GFP and SPX3-GFP expressed from their own  
735 promoter in *Medicago truncatula* roots in arbuscule-containing cells. Scale bar = 10  $\mu$ m.

736

737

738

### *SPX1* promoter:

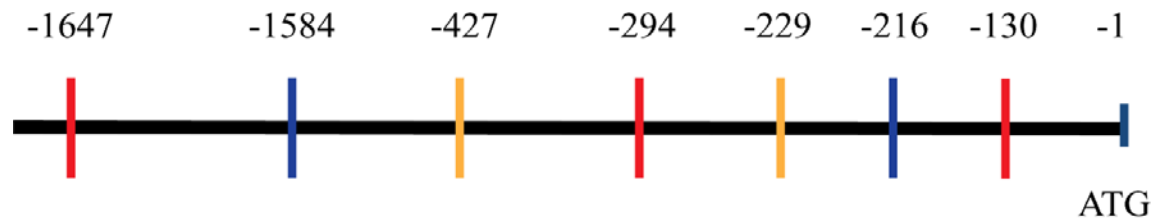

### *SPX3* promoter:

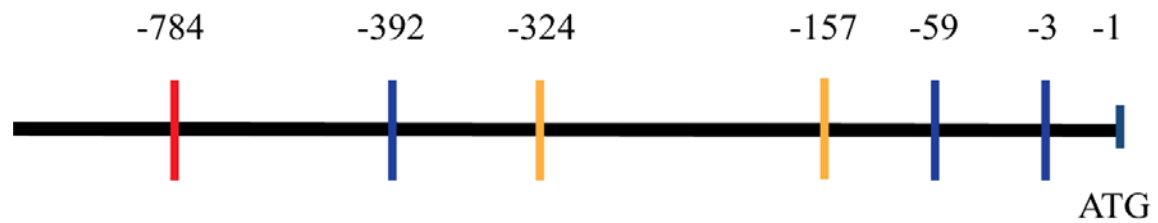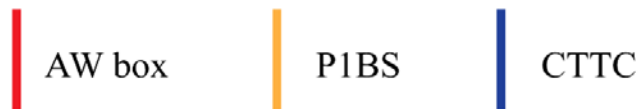

739

740 **Fig. S4** *SPX1* and *SPX3* promoters contain P1BS (GXATATXC), AW box (CG(X)7CXAXG) and CTTC  
741 (CTTCTTGTTTC) *cis*-regulatory elements.

742

743

744

745

746

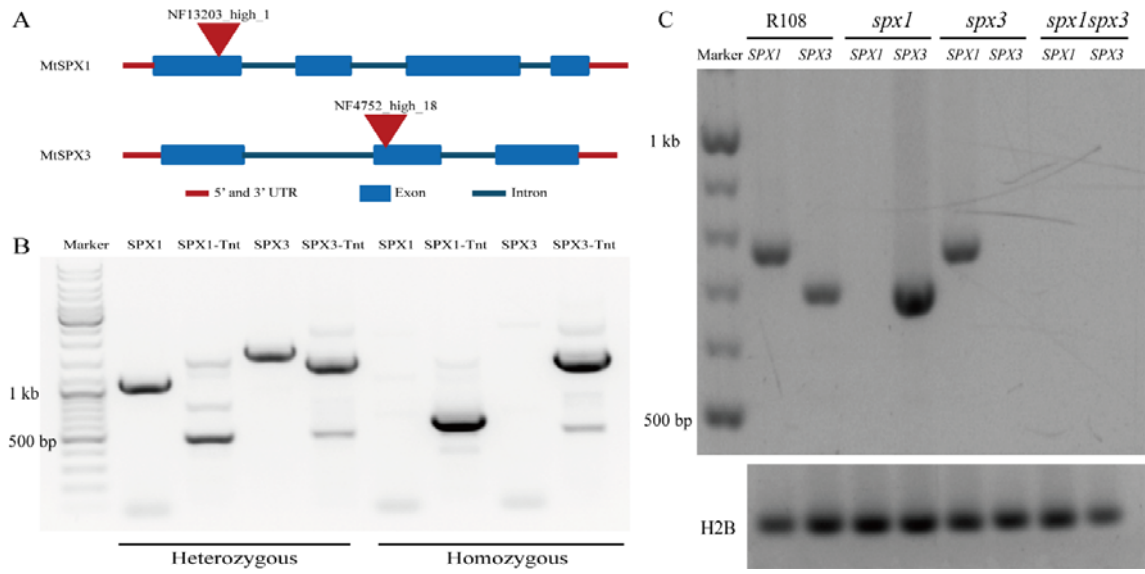

747

748 **Fig. S5** *spx1*, *spx3* and *spx1spx3* Tnt1-retrotransposon insertion lines. (A) Scheme of the Tnt1 insertions in *spx1*  
 749 (NF13203) and *spx3* (NF4752), indicated by triangles. (B) PCR using genomic DNA as template confirming the  
 750 Tnt1 insertions in both *SPX1* and *SPX3* in the *spx1spx3* double mutant. (C) RT-PCR showing the impairment of  
 751 *SPX1* and *SPX3* expression in the respective mutants. *Histone 2B* (*H2B*) is used as control.

752

753

754

755

756

757

758

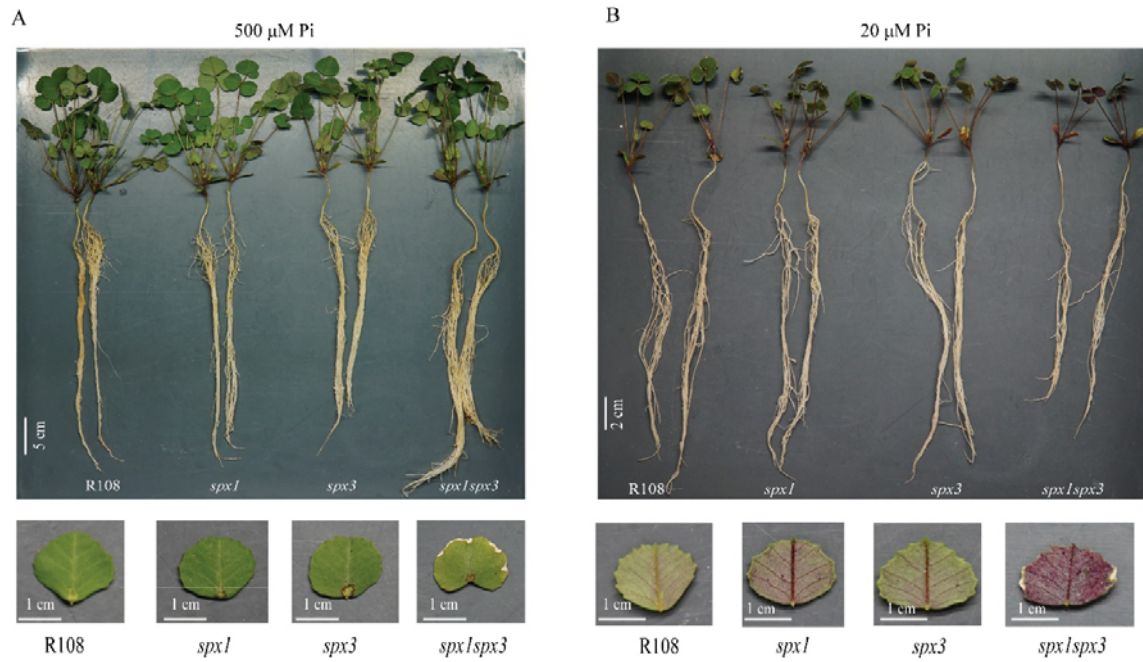

759

760 **Fig. S6** Phenotypes of *spx1*, *spx3*, and the double-mutant *spx1spx3*. (A) Phenotype of WT, *spx1*, *spx3*, and  
761 *spx1spx3* plants grown for 3 weeks in high Pi conditions (upper image). Bottom images show enlarged views of  
762 leaves. Note chlorosis of the leaf margins in the *spx1spx3* double mutant. (B) Phenotype of WT, *spx1*, *spx3*, and  
763 *spx1spx3* plants grown for 3 weeks in low Pi conditions (upper image). The enlarged views in the bottom images  
764 show the accumulation of anthocyanins as purple coloration.

765

766

767

768

769

770

771

772

773

774

775

776

777

778

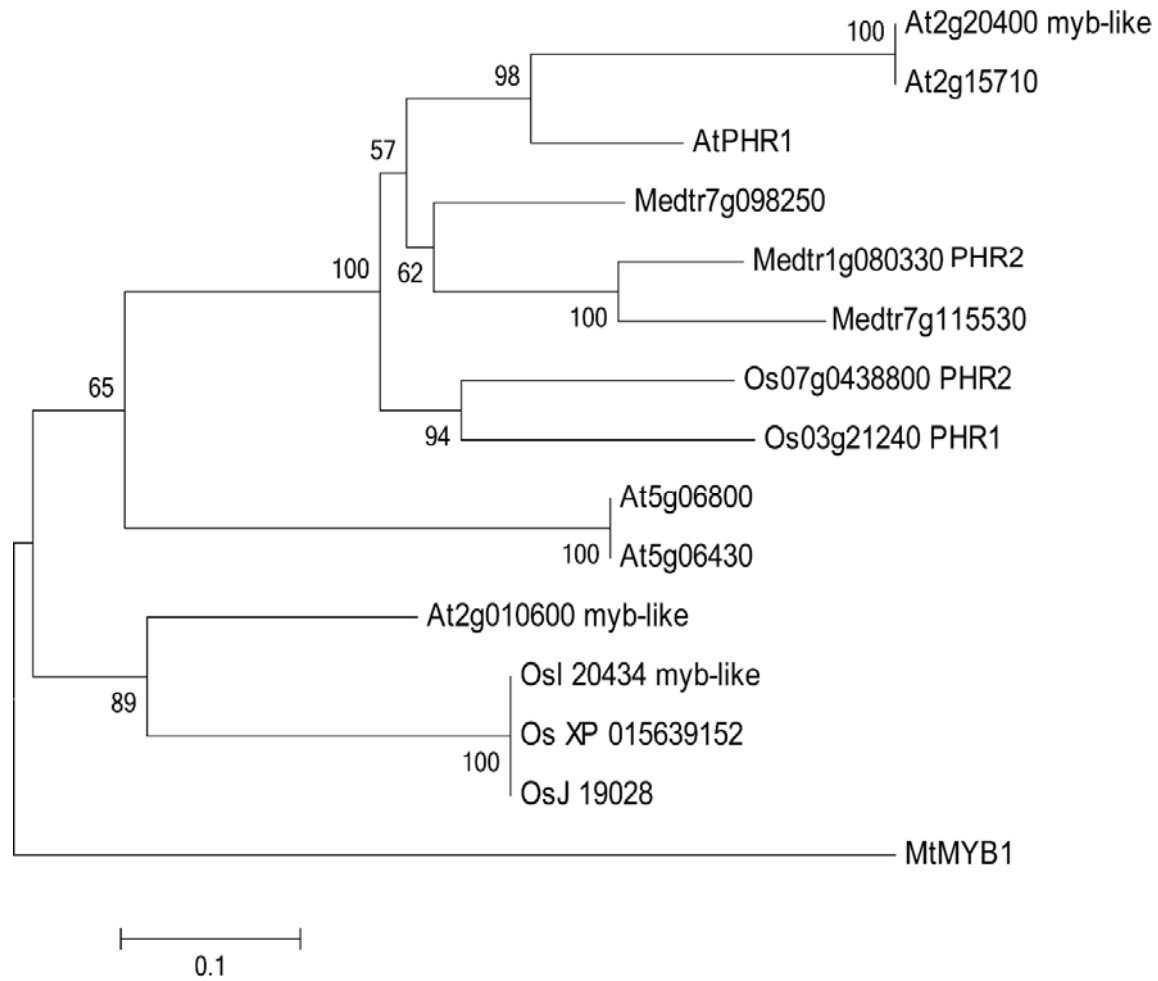

779

780 **Fig. S7** Phylogenetic tree of MYB family proteins from Medicago, Arabidopsis and rice generated using the  
781 neighbour-joining tree builder in Geneious R11.0 (<https://www.geneious.com>). 1000 bootstraps were used.  
782 Identifiers for the PHR genes are listed in Table S4.

783

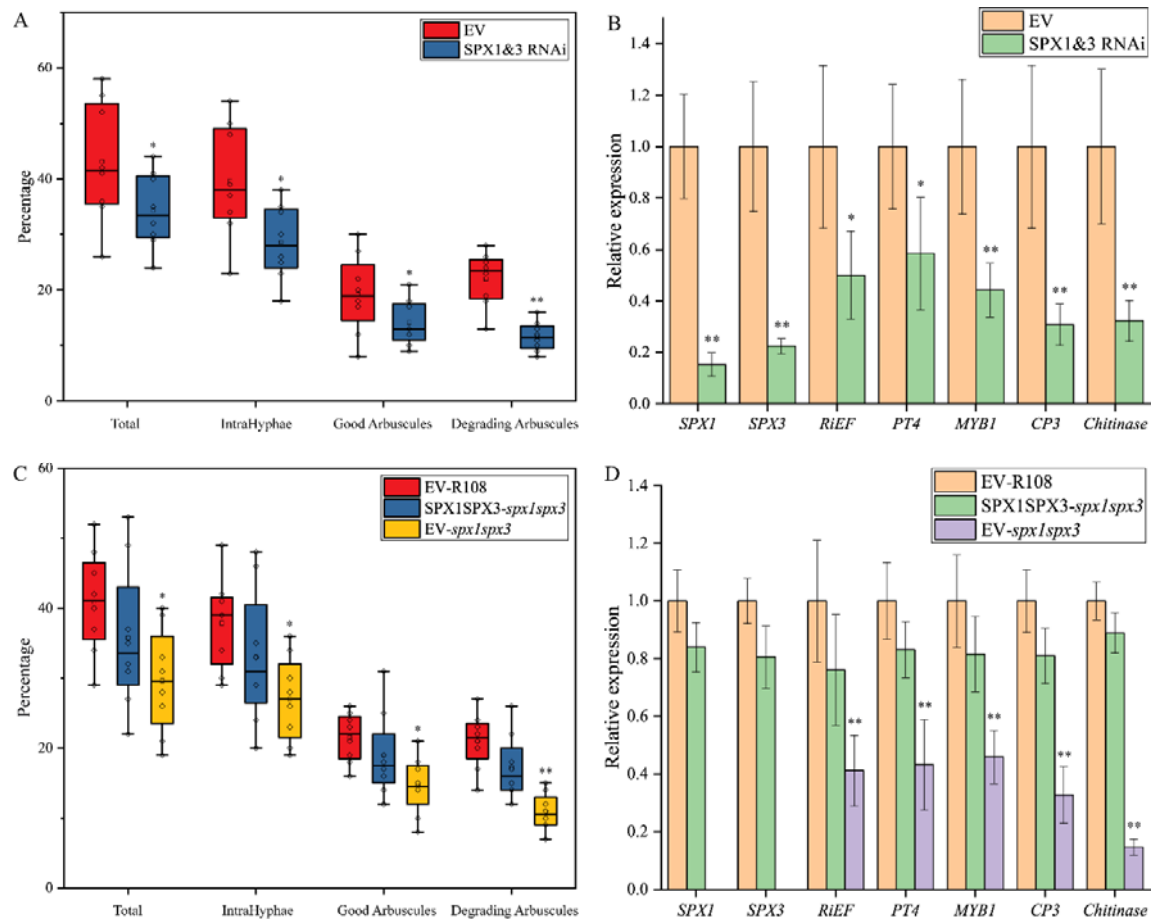

784

785 **Fig. S8** SPX1 and SPX3 control arbuscular mycorrhization. (A) RNAi knock down of *SPX1* and *SPX3*  
786 expression showing decreased arbuscular mycorrhization levels 3 weeks after inoculation in *Medicago*  
787 *truncatula* A17 roots compared to empty vector (EV) transformed roots. Significantly less degrading arbuscules  
788 were observed. 8 independent transformed roots were used as replicates for each sample. Total = presence of  
789 mycorrhiza in root segments, IntraHyphae = root segments containing intraradical hyphae; examples of good and  
790 degrading arbuscule classes is shown in Fig. 6 (B) Relative expression levels of *SPX1*, *SPX3*, *RiEF*, *PT4*, *CP3*,  
791 *Chitinase* and *MYB1* in root samples from (A) compared to empty vector (EV) controls. Values represent mean  $\pm$   
792 standard error of 6 independent replicates. (C) Expression of *SPX1* and *SPX3* under the control of their own  
793 promoters in the *spx1spx3* double mutant complemented the AM phenotype. 8 independent transformed plants  
794 were used as replicates for each sample. (D) Expression levels of *SPX1*, *SPX3*, *RiEF*, *PT4*, *CP3*, *Chitinase* and  
795 *MYB1* in root samples from (C). *MtEF1* was used as internal reference in the qPCR experiments shown in B and  
796 C. Values represent mean  $\pm$  standard error of mean of 6 independent replicates. In (A-D) data significantly  
797 different from EV controls are indicated \*  $P < 0.05$ ; \*\*  $P < 0.01$  (Student's t-test).

798

799

800

801

802

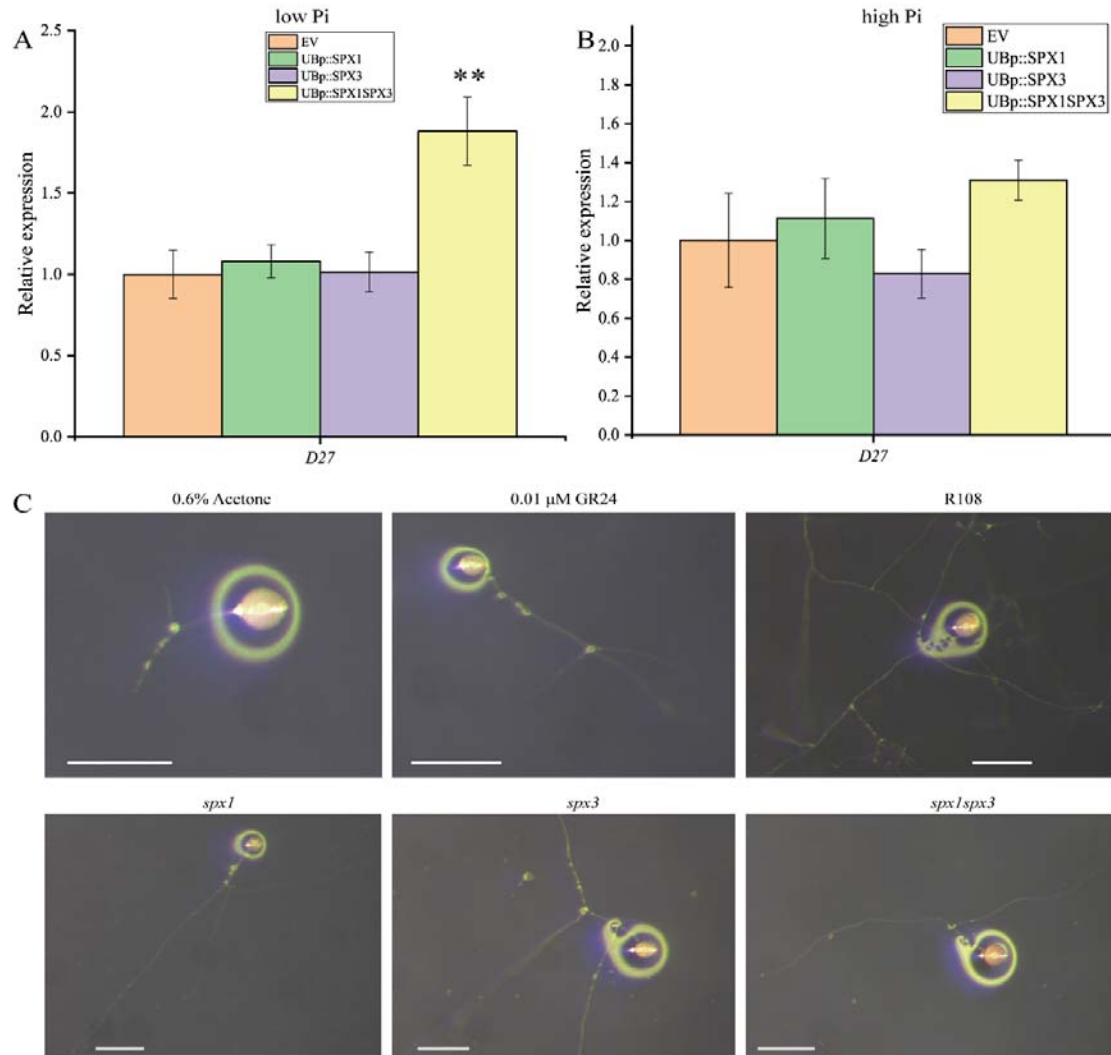

803

804 **Fig. S9** SPX1 and SPX3 likely regulate strigolactone biosynthesis. (A) Overexpression of *SPX1* and *SPX3*  
805 together in low Pi conditions induced *D27* expression. The samples correspond to Fig. 3E. (B) Overexpression of  
806 *SPX1* and *SPX3* in high Pi conditions did not affect *D27* expression. All values in (A-B) represent mean ±  
807 standard error of 3 independently transformed roots. *MtEF1* was used as reference gene in the qPCR experiment  
808 shown in A-B. Data significantly different from the corresponding empty vectors transformed controls are  
809 indicated \*\* P < 0.01 (Student's t-test). (C) Representative images of *Rhizophagus irregularis* spores treated  
810 with 0.6% acetone, 0.01 μM GR24, roots exudates of R108, *spx1*, *spx3* and *spx1spx3*. Scale bar = 250 μm.

811

812

813

814

815

816

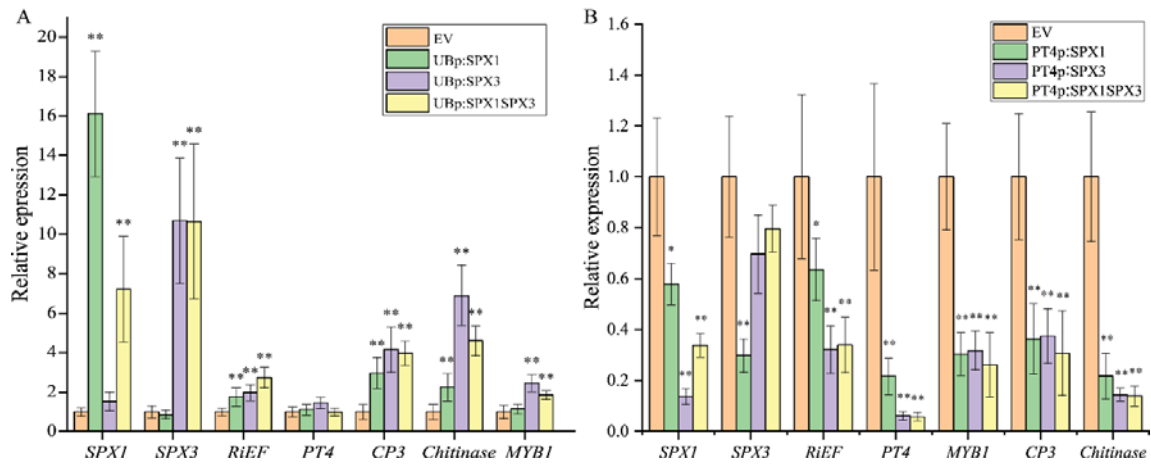

817

818 **Fig. S10** qPCR analysis of overexpression of *SPX1/3* under the control of the *LjUbiquitin1* or *PT4* promoter  
 819 increased AM colonization and/or arbuscule degradation. (A) Expression levels of *SPX1*, *SPX3*, *RiEF*, *PT4*, *CP3*,  
 820 *Chitinase*, *MYB1* in root samples from Fig. 6A as determined by qPCR. *MtEF1* was used as internal reference.  
 821 (B) Expression levels of *SPX1*, *SPX3*, *RiEF*, *PT4*, *CP3*, *Chitinase*, *MYB1* in root samples from Fig. 6D as  
 822 determined by qPCR. *MtEF1* was used as internal reference. All values in (A, B) represent mean  $\pm$  standard error  
 823 of mean of 6 independently transformed roots. Expression data significantly different from EV controls are  
 824 indicated \*\*  $P < 0.01$  (Student's t-test).

825

826

827

828



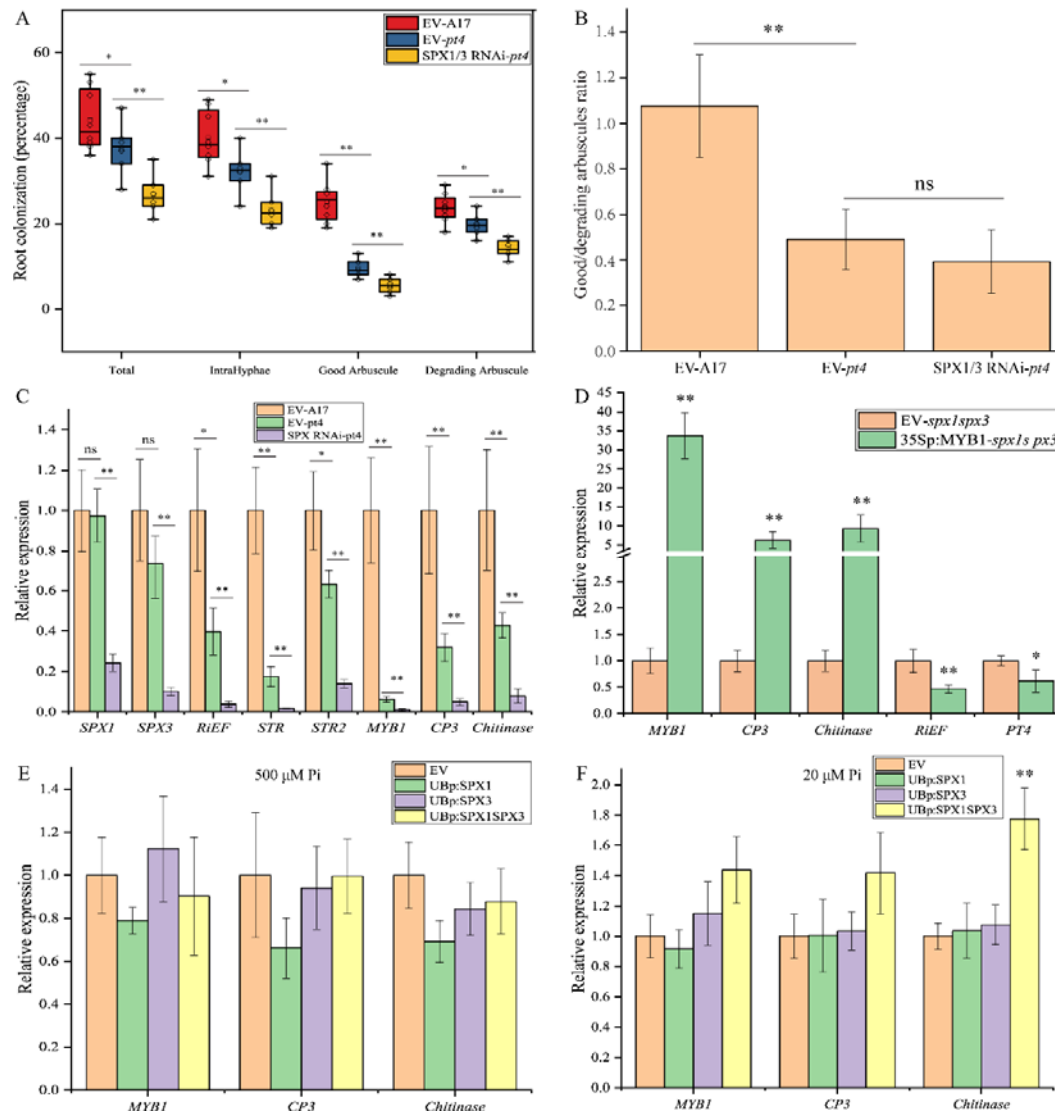

829

830 **Fig. S11** SPX1 and SPX3 function in relation to MYB1. (A) RNAi knock down of *SPX1* and *SPX3* expression in  
831 the *pt4* mutant background decreased AM colonization but did not affect the good/degrading arbuscules ratio. 6  
832 independently transformed plants were used as replicas for each sample. Data significantly different from  
833 indicated groups are indicated \*  $P < 0.05$ ; \*\*  $P < 0.01$  (Student's t-test). (B) Good-to-Degrading arbuscule ratio  
834 of mycorrhizal samples from (B). Values represent mean  $\pm$  standard deviation of 6 independent replicates. Data  
835 significantly different from indicated groups are indicated \*\*  $P < 0.01$ ; ns: not significant (Student's t-test). (C)  
836 Relative expression levels of *SPX1*, *SPX3*, *RiEF*, *STR*, *STR2*, *MYB1*, *CP3* and *Chitinase* in samples from (A)  
837 compared to EV controls. Values represent mean  $\pm$  standard error of 6 independently transformed roots. Data  
838 significantly different from indicated groups are indicated \*  $P < 0.05$ ; \*\*  $P < 0.01$ ; ns: not significant (Student's  
839 t-test). (D) Overexpression of *MYB1* under the control of *35S* promoter in the *spx1spx3* mutant background  
840 induced *CP3* and *Chitinase* expression and resulted in reduced *RiEF* and *PT4* expression compared to EV  
841 transformed roots 3 weeks post-inoculation. Values represent mean  $\pm$  standard deviation of 3 independent  
842 replicates. Data significantly different from EV controls are indicated \*  $P < 0.05$ ; \*\*  $P < 0.01$  (Student's t-test).  
843 (E) Overexpression of *SPX1* and *SPX3* in high Pi conditions had no effect on *MYB1*, *CP3* and *Chitinase*  
844 expression. Values represent mean  $\pm$  standard deviation of 3 independently transformed plants. (F)  
845 Overexpression of *SPX1* and *SPX3* together in low Pi conditions slightly increased *Chitinase* expression. cDNA

846 samples used correspond to Fig. 2E. Values represent mean  $\pm$  standard deviation of 3 independent replicates.

847 *MtEF1* was used as internal reference in the qPCR experiments shown in C-F.

848

849

850

851

852

853

854

855

856

857

858

859

860

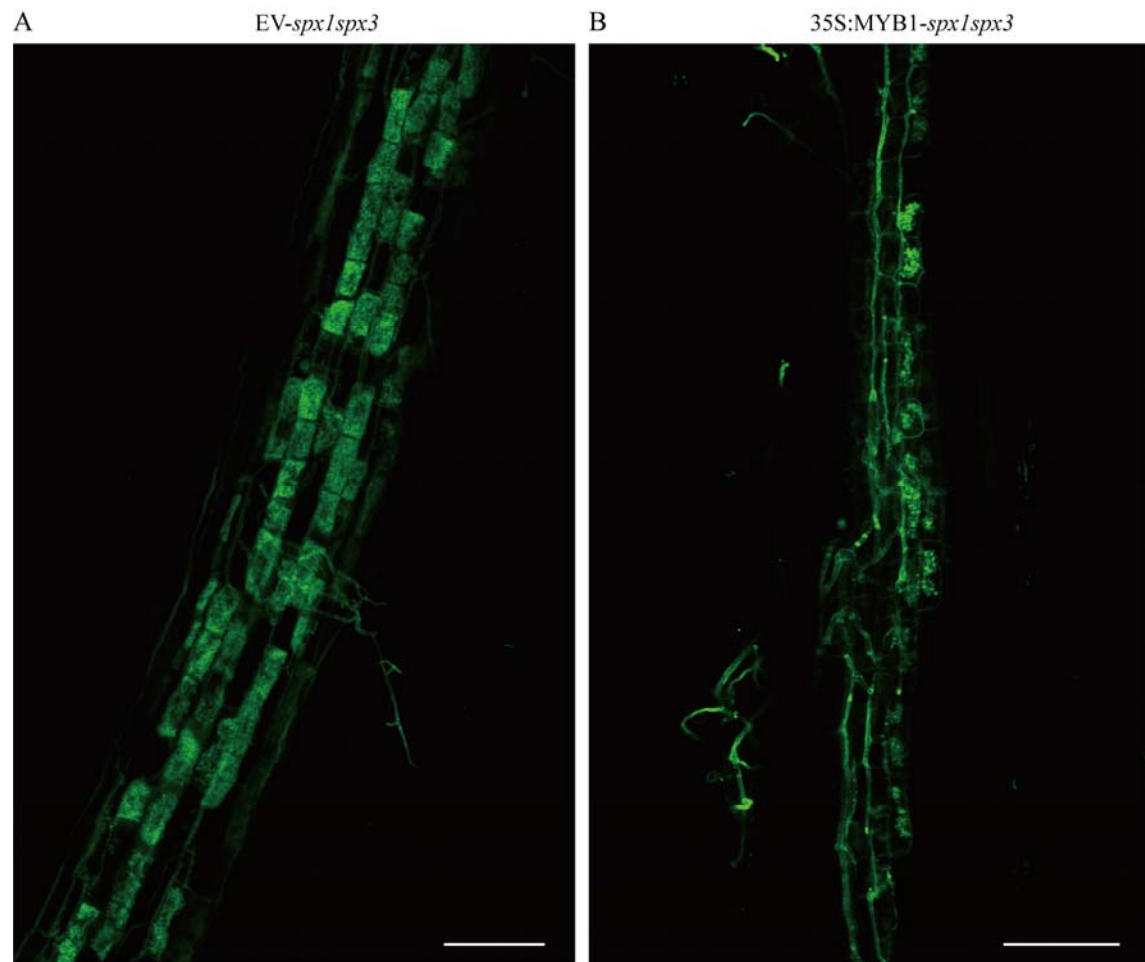

861

862 **Fig. S12** Representing images of *MYB1* overexpression mycorrhizal roots in the *spx1spx3* double mutant  
863 background. (A) Confocal picture of WGA-alexa488 stained empty vector transformed *spx1spx3* roots. Scale bar  
864 = 100  $\mu$ m. (B) Confocal picture of WGA-alexa488 stained *35S:MYB1* transgenic *spx1spx3* roots. Scale bar =  
865 100  $\mu$ m.

866

867

868

869

870

871

872

873

874

## 875 Supplementary Tables

**Table S1. Primers list used in this study**

| Experiment | Primer name      | Primer sequence                             |
|------------|------------------|---------------------------------------------|
| Goldengate | F-SPX1-CDS1-NS   | AGAAGACTCAATGAAGTTCTGGAAGATCTTGAAGA         |
| Goldengate | R-SPX1-CDS1-NS   | GGAAGACAGCGAATGAATGTGCTACCTTTTCCTTGT        |
| Goldengate | F-SPX3-CDS1-NS   | AGAAGACTCAATGAAGTTTGCAAAGATATATATTGATG      |
| Goldengate | R-SPX3-CDS1-NS   | GGAAGACAGCGAACGCTCGTTTTGCATAGAAGTCGTACC     |
| Goldengate | F-PT4-Pro-CCAT   | AGAAGACTCGGAGGACTCGATCCACAACAAAGATTAATTTTTG |
| Goldengate | R-PT4-Pro-CCAT   | GGAAGACGCATGGGACTCTCTCAAGTTGGTTTTGGAGTTAA   |
| Goldengate | F-PT4-Pro-AATG   | AGAAGACTCGGAGGACTCGATCCACAACAAAGATTAATTTTTG |
| Goldengate | R-PT4-pro-AATG   | GGAAGACGCATGGAAAAGGAAGACTCTCTCAAGTTGG       |
| Goldengate | F-SPX1-Pro-AATG  | AGAAGACTCGGAGGTAGACCTAGACCGAGTTTTACA        |
| Goldengate | R-SPX1-Pro-AATG  | GGAAGACGCCATTGACAATGTTAAGATCCTTTGCTCACT     |
| Goldengate | F-SPX3-Pro-AATG  | AGAAGACTCGGAGGACCACATATGTTGTGTATCGTGA       |
| Goldengate | R-SPX3-Pro-AATG  | GGAAGACGCCATTATCTTCTCTCTAAGATTAATCAACTTTG   |
| Goldengate | F-LjUB1-Pro-CCAT | AGAAGACTCGGAGGGAGAGAGGATTTTGAGGAAATA        |
| Goldengate | R-LjUB1-Pro-CCAT | GGAAGACGCATGGCTGTAATCACATCAACAACAGATAA      |
| Goldengate | F-LjUB1-Pro-AATG | AGAAGACTCGGAGGGAGAGAGGATTTTGAGGAAATA        |
| Goldengate | R-LjUB1-Pro-AATG | GGAAGACGCCATTCTGTAATCACATCAACAACAGATAA      |
| Goldengate | F-PHR2-CDS1      | AGAAGACTCAATGATGTCTTCGTCTATCCATCTTCCT       |
| Goldengate | R-PHR2-CDS1      | GGAAGACAGAAGCCTACTTGTGTCAGTCTTCACTCGT       |
| qPCR       | SPX1-qF          | TCAGCATTGCGTACCTTGGA                        |
| qPCR       | SPX1-qR          | TCCACAAGCTTACCTGACG                         |
| qPCR       | SPX3-qF          | AAGGAGAAGCAGCCAGGATG                        |
| qPCR       | SPX3-qR          | ACTCTGCCTCCTCACTTCCA                        |
| qPCR       | Medtr1g012440-qF | CAAGACAAAGTTGCCTGGGC                        |
| qPCR       | Medtr1g012440-qR | CACGCGCAACTTCTCAAAA                         |
| qPCR       | Medtr4g027390-qF | ATCGATGCAGTGTTCGGGT                         |
| qPCR       | Medtr4g027390-qR | GTAAGCCGCAACCGTGT                           |
| qPCR       | Medtr4g114550-qF | AGAAGTGGTCCCTCATTCG                         |
| qPCR       | Medtr4g114550-qR | CCACTTGATTGCAACGGTGG                        |
| qPCR       | Medtr8g077020-qF | TCTTGCTGCAATGAGAGCCA                        |
| qPCR       | Medtr8g077020-qR | TGGAGAATTTGCGCAGAGT                         |
| qPCR       | PHR2-qF          | GCAGCGCTTCAGAGAACATG                        |
| qPCR       | PHR2-qR          | AGCTCAAGTTCACCGGTAGC                        |
| qPCR       | WR15a-qF         | AAAGCGCGGAAGAGAATCA                         |
| qPCR       | WR15a-qR         | TGGATTGACCACTCACTGGC                        |
| qPCR       | MtD27-qF         | TTGCTTGGTTACTCGGTCCC                        |
| qPCR       | MtD27-qR         | CATCAGTTGATGCTGGGGGT                        |
| qPCR       | Mt4-qF           | GGAGAAGTGGATGGTGTGTGT                       |
| qPCR       | Mt4-qR           | GCCAAAGGATCGAAGTTGCC                        |
| qPCR       | STR-qF           | GCTCAGGGTGGTAGCATTGT                        |
| qPCR       | STR-qR           | AAGTCCAACCGTCGCTTGAT                        |
| qPCR       | STR2-qF          | ATGGTCCTCACCTTCATGGG                        |
| qPCR       | STR2-qR          | AAAGCTTGGAGCGCAAGAAA                        |
| qPCR       | MtEF-qF          | GATTGCCACACTCTCACAT                         |
| qPCR       | MtEF-qR          | TCAGCGAAGGTCTCAACCAC                        |

|            |              |                                |
|------------|--------------|--------------------------------|
| qPCR       | PT4-qF       | GGATTCTTTGACGCTTCTTGG          |
| qPCR       | PT4-qR       | GCTGTCAATTTGGTGTTCAGTG         |
| qPCR       | RiEF-qF      | ATTGTTCTGGTGCATTCA             |
| qPCR       | RiEF-qR      | AACCCCTTCGCTTCCACTT            |
| qPCR       | MtPT6-qF     | CGTGGTGCCTTTATAGCTGC           |
| qPCR       | MtPT6-qR     | TAATCGGCTTGCAGAACAGT           |
| qPCR       | MYB1-qF      | TAAGAGAGTTGATGATGATTGTC        |
| qPCR       | MYB1-qR      | GATGAGTGATTCTGTGAACC           |
| qPCR       | CP3-qF       | AACAATGATGCCAATAACAAGC         |
| qPCR       | CP3-qR       | GGAGCACATATGACCCCTGA           |
| qPCR       | Chitinase-qF | GGCATGTCAGAGGTGAAGAG           |
| qPCR       | Chitinase-qR | GCCAAAAGTCTTGTGATTG            |
| RNAi       | F-SPX3-RNAi  | CACCATGGAGGGACAAGTTCTTGTC      |
| RNAi       | R-SPX3-RNAi  | TTTGGTCTCACTCTTTCGGTCTTCACCA   |
| RNAi       | F-SPX1-RNAi  | TTTGGTCTCAAGAGCCAATCGAGCAGACC  |
| RNAi       | R-SPX1-RNAi  | GCAAGGGCAAGAAGGGCTAT           |
| Genotyping | Tnt1-F1      | TCCTTGTGGATTGGTAGCCAACCTTGTGG  |
| Genotyping | Tnt1-R1      | TGTAGCACCGAGATACGGTAATTAACAAGA |
| Genotyping | SPX1-F       | ATGAAGTCTGGAAGATCTTGAAGA       |
| Genotyping | SPX1-R       | CGAATGAATGTCTACCTTTTCCTTGT     |
| Genotyping | SPX3-F       | AATGAAGTTTGCAAGATATATTGATG     |
| Genotyping | SPX3-R       | CGAACGCTCGTTTTGCATAGAAGTCGTACC |

876

**Table S2. Constructs made using the golden gate cloning system**

| Level 0                    | Level 1                         | Level 2                                                        |
|----------------------------|---------------------------------|----------------------------------------------------------------|
| pAGM1251-MtPT4p-CCAT       | pICH47732-MtPT4p::SPX1-FLAG     | pAGM4723-LjUBQ1p::SPX1-GFP-AtUBQ10p::DsRed                     |
| pICH41295-MtPT4p-AATG      | pICH47751-MtPT4p::SPX3-FLAG     | pAGM4723-LjUBQ1p::SPX3-GFP-AtUBQ10p::DsRed                     |
| pICH41295-LjUBQ1p-AATG     | pICH47732-MtPT4p::FLAG-PHR2     | pAGM4723-LjUBQ1p::SPX1-FLAG-AtUBQ10p::DsRed                    |
| pAGM1251-LjUBQ1p-CCAT      | pICH47732-LjUBQ1p::SPX1-FLAG    | pAGM4723-LjUBQ1p::SPX3-FLAG-AtUBQ10p::DsRed                    |
| pICH41295-SPX1p-AATG       | pICH47732-LjUBQ1p::SPX3-FLAG    | pAGM4723-SPX1p::SPX1-GFP-AtUBQ10p::DsRed                       |
| pICH41295-SPX3p-AATG       | pICH47732-LjUBQ1p::SPX1-GFP     | pAGM4723-SPX3p::SPX3-GFP-AtUBQ10p::DsRed                       |
| pAGM1287-SPX1 CDS1 no stop | pICH47732-LjUBQ1p::SPX3-GFP     | pAGM4723-LjUBQ1p::SPX1-FLAG-AtUBQ10p::DsRed-LjUBQ1p::SPX3-FLAG |
| pAGM1287-SPX3 CDS1 no stop | pICH47751-LjUBQ1p::SPX3-GFP     | pAGM4723-PT4p::SPX1-FLAG-AtUBQ10p::DsRed-PT4p::SPX3-FLAG       |
| pICH41308-PHR2 CDS1        | pICH47761-LjUBQ1p::GFP-MYB1     | pAGM4723-PT4p::SPX1-FLAG-AtUBQ10p::DsRed                       |
| pICH41308-MYB1-CDS1        | pICH47751-LjUBQ1p::GFP-PHR2     | pAGM4723-PT4p::FLAG-PHR2-AtUBQ10p::DsRed                       |
| pICH41308-NSP1-CDS1        | pICH47732-SPX1p::SPX1-GFP       | pAGM4723-LjUBQ1p::FLAG-PHR2-AtUBQ10p::DsRed                    |
| pICH41308-DELLAA18-CDS1    | pICH47751-SPX3p::SPX3-GFP       | pAGM4723-LjUBQ1p::GFP-PHR2-AtUBQ10p::DsRed                     |
|                            | pICH47811-AtUBQ10p::DsRed       | pAGM4723-LjUBQ1p::SPX1-FLAG-AtUBQ10p::DsRed-LjUBQ1p::GFP-PHR2  |
|                            | pICH47751-LjUBQ1p::GFP-NSP1     | pAGM4723-LjUBQ1p::SPX3-FLAG-AtUBQ10p::DsRed-LjUBQ1p::GFP-PHR2  |
|                            | pICH47732-LjUBQ1p::GFP-DELLAA18 | pAGM4723-LjUBQ1p::GFP-MYB1-AtUBQ10p::DsRed                     |
|                            | pICH47751-LjUBQ1p::FLAG-NSP1    | pAGM4723-LjUBQ1p::GFP-PHR2-AtUBQ10p::DsRed                     |
|                            |                                 | pAGM4723-LjUBQ1p::GFP-NSP1-AtUBQ10p::DsRed                     |
|                            |                                 | pAGM4723-LjUBQ1p::SPX1-FLAG-AtUBQ10p::DsRed-LjUBQ1p::GFP-NSP1  |
|                            |                                 | pAGM4723-LjUBQ1p::SPX3-FLAG-AtUBQ10p::DsRed-LjUBQ1p::GFP-NSP1  |
|                            |                                 | pAGM4723-LjUBQ1p::GFP-DELLAA18-AtUBQ10p::DsRed                 |

877

878

879

880

**Table S3 SPX1 and SPX3 expression fold changes in wild-type and *ram1-1* roots during mycorrhization. Fold changes with an FDR-corrected p-value < 0.05 are shown. Data collected from (Luginbuehl et al., 2017).**

| Gene  | wild type |        |        | <i>ram1-1</i> |        |        |
|-------|-----------|--------|--------|---------------|--------|--------|
|       | 8 dpi     | 13 dpi | 27 dpi | 8 dpi         | 13 dpi | 27 dpi |
| SPX1  | 4         | 5      | 7      | 3             | 3      | n.s.   |
| SPX3  | n.s.      | 57     | 19     | n.s.          | 9      | 5      |
| WRI5a | 86        | 1053   | 1152   | n.s.          | n.s.   | n.s.   |

881

**Table S4 Identifier of genes used for Phylogenetic tree**

| Name   | Gene ID        |
|--------|----------------|
| AtSPX1 | AT5G20150      |
| AtSPX2 | AT2G26660      |
| AtSPX3 | AT2G45130      |
| AtSPX4 | AT5G15330      |
| OsSPX1 | LOC_Os06g40120 |
| OsSPX2 | LOC_Os02g10780 |
| OsSPX3 | LOC_Os10g25310 |
| OsSPX4 | LOC_Os03g61200 |
| OsSPX5 | LOC_Os03g29250 |
| OsSPX6 | LOC9271158     |
| AtPHR1 | AT4G28610      |
| MtMYB1 | Medtr7g068600  |

882

## Parsed Citations

- Akiyama, K., Matsuzaki, K.I., and Hayashi, H. (2005). Plant sesquiterpenes induce hyphal branching in arbuscular mycorrhizal fungi. *Nature* 435: 824–827.  
Google Scholar: [Author Only](#) [Title Only](#) [Author and Title](#)
- An, J., Zeng, T., Ji, C., de Graaf, S., Zheng, Z., Xiao, T.T., Deng, X., Xiao, S., Bisseling, T., Limpens, E., and Pan, Z (2019). A *Medicago truncatula* SWEET transporter implicated in arbuscule maintenance during arbuscular mycorrhizal symbiosis. *New Phytol.* 224: 396–408.  
Google Scholar: [Author Only](#) [Title Only](#) [Author and Title](#)
- Bari, R., Pant, B.D., Stitt, M., and Scheible, W.R. (2006). PHO2, microRNA399, and PHR1 define a phosphate-signaling pathway in plants. *Plant Physiol.*  
Google Scholar: [Author Only](#) [Title Only](#) [Author and Title](#)
- BÉCARD, G. and FORTIN, J.A (1988). Early events of vesicular–arbuscular mycorrhiza formation on Ri T-DNA transformed roots. *New Phytol.*  
Google Scholar: [Author Only](#) [Title Only](#) [Author and Title](#)
- Besserer, A, Bécard, G., Jauneau, A, Roux, C., and Séjalon-Delmas, N. (2008). GR24, a synthetic analog of strigolactones, stimulates the mitosis and growth of the arbuscular mycorrhizal fungus *Gigaspora rosea* by boosting its energy metabolism. *Plant Physiol.* 148: 402–413.  
Google Scholar: [Author Only](#) [Title Only](#) [Author and Title](#)
- Besserer, A, Puech-Pagès, V., Kiefer, P., Gomez-Roldan, V., Jauneau, A, Roy, S., Portais, J.C., Roux, C., Bécard, G., and Séjalon-Delmas, N. (2006). Strigolactones stimulate arbuscular mycorrhizal fungi by activating mitochondria. *PLoS Biol.* 4: 1239–1247.  
Google Scholar: [Author Only](#) [Title Only](#) [Author and Title](#)
- Breullin-Sessoms, F. et al. (2015). Suppression of arbuscule degeneration in *Medicago truncatula* phosphate transporter4 mutants is dependent on the ammonium transporter 2 family protein AMT2;3. *Plant Cell.*  
Google Scholar: [Author Only](#) [Title Only](#) [Author and Title](#)
- Bungard, D., Fuerth, B.J., Zeng, P.Y., Faubert, B., Maas, N.L., Violet, B., Carling, D., Thompson, C.B., Jones, R.G., and Berger, S.L. (2010). Signaling kinase AMPK activates stress-promoted transcription via histone H2B phosphorylation. *Science* (80- ). 329: 1201–1205.  
Google Scholar: [Author Only](#) [Title Only](#) [Author and Title](#)
- Burleigh, S.H. and Harrison, M.J. (1999). The down-regulation of Mt4-like genes by phosphate fertilization occurs systemically and involves phosphate translocation to the shoots. *Plant Physiol.*  
Google Scholar: [Author Only](#) [Title Only](#) [Author and Title](#)
- Bustos, R., Castrillo, G., Linhares, F., Puga, M.I., Rubio, V., Pérez-Pérez, J., Solano, R., Leyva, A, and Paz-Ares, J. (2010). A central regulatory system largely controls transcriptional activation and repression responses to phosphate starvation in arabidopsis. *PLoS Genet.*  
Google Scholar: [Author Only](#) [Title Only](#) [Author and Title](#)
- Christophersen, H.M., Smith, F.A, and Smith, S.E. (2009). Arbuscular mycorrhizal colonization reduces arsenate uptake in barley via downregulation of transporters in the direct epidermal phosphate uptake pathway. *New Phytol.* 184: 962–974.  
Google Scholar: [Author Only](#) [Title Only](#) [Author and Title](#)
- Engler, C., Youles, M., Gruetzner, R., Ehnert, T.M., Werner, S., Jones, J.D.G., Patron, N.J., and Marillonnet, S. (2014). A Golden Gate modular cloning toolbox for plants. *ACS Synth. Biol.* 3: 839–843.  
Google Scholar: [Author Only](#) [Title Only](#) [Author and Title](#)
- Ezawa, T. and Saito, K. (2018). How do arbuscular mycorrhizal fungi handle phosphate? New insight into fine-tuning of phosphate metabolism. *New Phytol.* 220: 1116–1121.  
Google Scholar: [Author Only](#) [Title Only](#) [Author and Title](#)
- Floss, D.S., Gomez, S.K., Park, H.J., MacLean, A.M., Müller, L.M., Bhattarai, K.K., Lévesque-Tremblay, V., Maldonado-Mendoza, I.E., and Harrison, M.J. (2017). A Transcriptional Program for Arbuscule Degeneration during AM Symbiosis Is Regulated by MYB1. *Curr. Biol.* 27: 1206–1212.  
Google Scholar: [Author Only](#) [Title Only](#) [Author and Title](#)
- Hao, L., Renxiao, W., Qian, Q., Meixian, Y., Xiangbing, M., Zhiming, F., Cunyu, Y., Biao, J., Zhen, S., Jiayang, L., and Yonghong, W. (2009). DWARF27, an iron-containing protein required for the biosynthesis of strigolactones, regulates rice tiller bud outgrowth. *Plant Cell.*  
Google Scholar: [Author Only](#) [Title Only](#) [Author and Title](#)
- Hogekamp, C. and Küster, H. (2013). A roadmap of cell-type specific gene expression during sequential stages of the arbuscular mycorrhiza symbiosis. *BMC Genomics* 14: 306 (2013).  
Google Scholar: [Author Only](#) [Title Only](#) [Author and Title](#)
- Hogland, D.R. (1950). The Water Culture Method for Growing Plants without Soil THE COLLEGE OF AGRICULTURE. *Agriculture.*  
Google Scholar: [Author Only](#) [Title Only](#) [Author and Title](#)

Hu, B. et al. (2019). Nitrate–NRT1.1B–SPX4 cascade integrates nitrogen and phosphorus signalling networks in plants. *Nat. Plants* 5: 401–413.

Google Scholar: [Author Only Title Only Author and Title](#)

Javot, H., Penmetsa, R.V., Terzaghi, N., Cook, D.R., and Harrison, M.J. (2007). A *Medicago truncatula* phosphate transporter indispensable for the arbuscular mycorrhizal symbiosis. *Proc. Natl. Acad. Sci. U. S. A.* 104: 1720–1725.

Google Scholar: [Author Only Title Only Author and Title](#)

Jiang, Y., Xie, Q., Wang, W., Yang, J., Zhang, X., Yu, N., Zhou, Y., and Wang, E. (2018). *Medicago* AP2-Domain Transcription Factor WRI5a Is a Master Regulator of Lipid Biosynthesis and Transfer during Mycorrhizal Symbiosis. *Mol. Plant* 11: 1344–1359.

Google Scholar: [Author Only Title Only Author and Title](#)

Jung, J.Y., Ried, M.K., Hothorn, M., and Poirier, Y. (2018). Control of plant phosphate homeostasis by inositol pyrophosphates and the SPX domain. *Curr. Opin. Biotechnol.* 49: 156–162.

Google Scholar: [Author Only Title Only Author and Title](#)

Kiers, E.T. et al. (2011). Reciprocal rewards stabilize cooperation in the mycorrhizal symbiosis. *Science* (80-. ). 333: 880–882.

Google Scholar: [Author Only Title Only Author and Title](#)

Kobae, Y. and Hata, S. (2010). Dynamics of periarbuscular membranes visualized with a fluorescent phosphate transporter in arbuscular mycorrhizal roots of rice. *Plant Cell Physiol.*

Google Scholar: [Author Only Title Only Author and Title](#)

Kohlen, W., Charnikhova, T., Liu, Q., Bours, R., Domagalska, M.A., Beguerie, S., Verstappen, F., Leyser, O., Bouwmeester, H., and Ruyter-Spira, C. (2011). Strigolactones are transported through the xylem and play a key role in shoot architectural response to phosphate deficiency in nonarbuscular mycorrhizal host arabidopsis. *Plant Physiol.*

Google Scholar: [Author Only Title Only Author and Title](#)

Lanfranco, L., Fiorilli, V., and Gutjahr, C. (2018). Partner communication and role of nutrients in the arbuscular mycorrhizal symbiosis. *New Phytol.* 220: 1031–1046.

Google Scholar: [Author Only Title Only Author and Title](#)

Limpens, E. and Geurts, R. (2018). Transcriptional Regulation of Nutrient Exchange in Arbuscular Mycorrhizal Symbiosis. *Mol. Plant* 11: 1421–1423.

Google Scholar: [Author Only Title Only Author and Title](#)

Limpens, E., Ramos, J., Franken, C., Raz, V., Compaan, B., Franssen, H., Bisseling, T., and Geurts, R. (2004). RNA interference in *Agrobacterium rhizogenes*-transformed roots of *Arabidopsis* and *Medicago truncatula*. *J. Exp. Bot.* 55: 983–992.

Google Scholar: [Author Only Title Only Author and Title](#)

Liu, W. et al. (2011). Strigolactone biosynthesis in *Medicago truncatula* and rice requires the symbiotic GRAS-type transcription factors NSP1 and NSP2. *Plant Cell.*

Google Scholar: [Author Only Title Only Author and Title](#)

Luginbuehl, L.H., Menard, G.N., Kurup, S., Van Erp, H., Radhakrishnan, G. V., Breakspear, A., Oldroyd, G.E.D., and Eastmond, P.J. (2017). Fatty acids in arbuscular mycorrhizal fungi are synthesized by the host plant. *Science* (80-. ). 356: 1175–1178.

Google Scholar: [Author Only Title Only Author and Title](#)

Luginbuehl, L.H. and Oldroyd, G.E.D. (2017). Understanding the Arbuscule at the Heart of Endomycorrhizal Symbioses in Plants. *Curr. Biol.* 27: R952–R963.

Google Scholar: [Author Only Title Only Author and Title](#)

Mbodj, D., Effa-Effa, B., Kane, A., Manneh, B., Gantet, P., Laplaze, L., Diedhiou, A.G., and Grondin, A. (2018). Arbuscular mycorrhizal symbiosis in rice: Establishment, environmental control and impact on plant growth and resistance to abiotic stresses. *Rhizosphere* 8: 12–26.

Google Scholar: [Author Only Title Only Author and Title](#)

McGONIGLE, T.P., MILLER, M.H., EVANS, D.G., FAIRCHILD, G.L., and SWAN, J.A. (1990). A new method which gives an objective measure of colonization of roots by vesicular-arbuscular mycorrhizal fungi. *New Phytol.*

Google Scholar: [Author Only Title Only Author and Title](#)

Müller, L.M. and Harrison, M.J. (2019). Phytohormones, miRNAs, and peptide signals integrate plant phosphorus status with arbuscular mycorrhizal symbiosis. *Curr. Opin. Plant Biol.* 50: 132–139.

Google Scholar: [Author Only Title Only Author and Title](#)

Puga, M.I. et al. (2014). SPX1 is a phosphate-dependent inhibitor of Phosphate Starvation Response 1 in *Arabidopsis*. *Proc. Natl. Acad. Sci. U. S. A.* 111: 14947–14952.

Google Scholar: [Author Only Title Only Author and Title](#)

Rouached, H., Arpat, A.B., and Poirier, Y. (2010). Regulation of phosphate starvation responses in plants: Signaling players and cross-talks. *Mol. Plant* 3: 288–299.

Google Scholar: [Author Only Title Only Author and Title](#)

Shi, J., Hu, H., Zhang, K., Zhang, W., Yu, Y., Wu, Z., and Wu, P. (2014). The paralogous SPX3 and SPX5 genes redundantly modulate Pi



**homeostasis in rice. J. Exp. Bot. 65: 859–870.**

Google Scholar: [Author Only](#) [Title Only](#) [Author and Title](#)

**Smith, S. and Read, D. (2008). Mycorrhizal Symbiosis Third Edit. (Academic Press: Cambridge, UK).**

Google Scholar: [Author Only](#) [Title Only](#) [Author and Title](#)

**Smith, S.E., Smith, F.A., and Jakobsen, I. (2004). Functional diversity in arbuscular mycorrhizal (AM) symbioses: The contribution of the mycorrhizal P uptake pathway is not correlated with mycorrhizal responses in growth or total P uptake. New Phytol.**

Google Scholar: [Author Only](#) [Title Only](#) [Author and Title](#)

**Sun, L., Song, L., Zhang, Y., Zheng, Z., and Liu, D. (2016). Arabidopsis PHL2 and PHR1 act redundantly as the key components of the central regulatory system controlling transcriptional responses to phosphate starvation. Plant Physiol. 170: 499–514.**

Google Scholar: [Author Only](#) [Title Only](#) [Author and Title](#)

**Tsuzuki, S., Handa, Y., Takeda, N., and Kawaguchi, M. (2016). Strigolactone-induced putative secreted protein 1 is required for the establishment of symbiosis by the arbuscular mycorrhizal fungus Rhizophagus irregularis. Mol. Plant-Microbe Interact. 29: 277–286.**

Google Scholar: [Author Only](#) [Title Only](#) [Author and Title](#)

**Wang, S. et al. (2020). Functional analysis of the OsNPF4.5 nitrate transporter reveals a conserved mycorrhizal pathway of nitrogen acquisition in plants. Proc. Natl. Acad. Sci.: 20200926.**

Google Scholar: [Author Only](#) [Title Only](#) [Author and Title](#)

**Wang, Z. et al. (2014). Rice SPX1 and SPX2 inhibit phosphate starvation responses through interacting with PHR2 in a phosphate-dependent manner. Proc. Natl. Acad. Sci. U. S. A. 111: 14953–14958.**

Google Scholar: [Author Only](#) [Title Only](#) [Author and Title](#)

**Wild, R., Gerasimaite, R., Jung, J.Y., Truffault, V., Pavlovic, I., Schmidt, A., Saiardi, A., Jacob Jessen, H., Poirier, Y., Hothorn, M., and Mayer, A. (2016). Control of eukaryotic phosphate homeostasis by inositol polyphosphate sensor domains. Science (80-. ). 352: 986–990.**

Google Scholar: [Author Only](#) [Title Only](#) [Author and Title](#)

**Xue, L., Klinnawee, L., Zhou, Y., Saridis, G., Vijayakumar, V., Brands, M., Dörmann, P., Gigolashvili, T., Turck, F., and Bucher, M. (2018). AP2 transcription factor CBX1 with a specific function in symbiotic exchange of nutrients in mycorrhizal Lotus japonicus. Proc. Natl. Acad. Sci. U. S. A. 115: E9239–E9246.**

Google Scholar: [Author Only](#) [Title Only](#) [Author and Title](#)

**Yang, S.Y. et al. (2012). Nonredundant regulation of rice arbuscular mycorrhizal symbiosis by two members of the PHOSPHATE TRANSPORTER1 gene family. Plant Cell.**

Google Scholar: [Author Only](#) [Title Only](#) [Author and Title](#)

**van Zeijl, A., Liu, W., Xiao, T.T., Kohlen, W., Yang, W.C., Bisseling, T., and Geurts, R. (2015). The strigolactone biosynthesis gene DWARF27 is co-opted in rhizobium symbiosis. BMC Plant Biol. 15: 1–15.**

Google Scholar: [Author Only](#) [Title Only](#) [Author and Title](#)

**Zeng, T., Holmér, R., Hontelez, J., te Lintel-Hekkert, B., Marufu, L., de Zeeuw, T., Wu, F., Schijlen, E., Bisseling, T., and Limpens, E. (2018). Host- and stage-dependent secretome of the arbuscular mycorrhizal fungus Rhizophagus irregularis. Plant J. 94: 411–425.**

Google Scholar: [Author Only](#) [Title Only](#) [Author and Title](#)

**Zeng, T., Rodriguez-Moreno, L., Mansurkhodzaev, A., Wang, P., van den Berg, W., Gascioli, V., Cottaz, S., Fort, S., Thomma, B.P.H.J., Bono, J.J., Bisseling, T., and Limpens, E. (2020). A lysin motif effector subverts chitin-triggered immunity to facilitate arbuscular mycorrhizal symbiosis. New Phytol. 225: 448–460.**

Google Scholar: [Author Only](#) [Title Only](#) [Author and Title](#)

**Zhou, J., Jiao, F.C., Wu, Z., Li, Y., Wang, X., He, X., Zhong, W., and Wu, P. (2008). OsPHR2 is involved in phosphate-starvation signaling and excessive phosphate accumulation in shoots of plants. Plant Physiol. 146: 1673–1686.**

Google Scholar: [Author Only](#) [Title Only](#) [Author and Title](#)
